# Supplementary material
Source: Research Square preprint supplement (doi:10.21203/rs.3.rs-9227856/v1)
Supplement: Supplementary file 1 [file 36673c5293d0c409789055c0.docx]

**Supporting Information**

**Synergistic effect between rare-earth and copper species enhances hydrothermal stability of Cu-SSZ-13 for NO abatement**

*Liu Yang a, 1, Yuanjiang Wang a, 1, Tiantian Zhang a, Hao Qu a, Xin Guo a, Cheng Zhang a,* *Yan Wang a, *, Mi Yan a, d, and Pengfei Xiea, b, c**

a State Key Laboratory of Baiyunobo Rare Earth Resource Researches and Comprehensive Utilization, Baotou Research Institute of Rare Earths, Baotou 014030, China

b Key Laboratory of Biomass Chemical Engineering of Ministry of Education, College of Chemical and Biological Engineering, Zhejiang University, Hangzhou 310058, China

c Institute of Zhejiang University-Quzhou, Quzhou 324000, China

d Zhejiang Province Key Laboratory of Advanced Information Materials, School of Materials Science and Engineering, Zhejiang University, Hangzhou 310058, China

1 Liu Yang and Yuanjiang Wang contributed equally to this work.

* Corresponding Authors Email: [pfxie@zju.edu.cn](mailto:pfxie@zju.edu.cn); [wy_brire@brire.com](mailto:wy_brire@brire.com).

**Text S1. Catalyst Characterization**

X-ray Fluorescence Spectrometer (XRF) was employed to analyze the contents of Si and Al in the samples, utilizing a Shimadzu EDX-7000 instrument. ICP (Inductive Coupled Plasma Emission Spectrometer) was used to analyze other elements content used Agilent 725ES & Agilent 5110 instrument. X-ray powder diffraction (XRD) tests were collected on a Rigaku SmartLab SE diffractometer with Cu K*α* radiation at a scanning range from 5 to 55o. X-ray photoelectron spectroscopy (XPS) was performed on a Thermo ESCALAB 250XI spectrometer using Al K*α* X-ray radiation. The binding energies of C 1*s* (284.6 eV) were corrected all XPS spectrum. Electron paramagnetic resonance (EPR) spectroscopy was performed using a Bruker A300 instrument to analyze Cu2+ species at -150 ℃ and room temperature.

Temperature programmed reduction of hydrogen (H2-TPR) and Temperature programmed desorption of ammonia (NH3-TPD) tests were conducted on a Antom Paar Chem 3000 instrument. For H2-TPR test, 100mg of 60 ~ 100 mesh catalyst was pretreated under pure helium (He) at 300 ℃ for 1 h and then cooled down to 30 ℃, which was heated to 900℃ at 10 ℃ min−1 in a 5% H2/Ar at a flow rate of 100 ml/min. For NH3-TPD teat, 50 mg catalyst was pretreated by nitrogen for 1 h at 400 ℃. Then, the sample was adsorbed by 6000 ppm NH3/He at 100 ℃ for 150 min and purged by N2 for 40 min. Desorption signal was collected from 150 to 900 ℃ at a heating rate of 10 ℃/min. Luo[1] indicate that each ZCu(OH)+ site can adsorb 1 NH3 molecule, while each Z2Cu site can adsorb up to 2 NH3 molecules.

The diffuse reflectance infrared Fourier transform spectroscopy (DRIFTS) experiments were implemented on a Fourier transform infrared spectrometer (FTIR, Nicolet iS50) with the MCT/A detector. For the NH3 adsorption, the catalyst was pretreated at 450 ℃ in 20% O2/N2 for 60 min and subsequently cooled to 50 ℃. After the background spectra were collected under pure N2, 500 ppm of NH3 in N2 was introduced. In the transient studies, each catalyst was first at 450℃ for 60 min with 100 mL/min N2 and then cooled to 170 ℃ to collect the background spectra. Subsequently, 500 ppm NH3/N2 was introduced 60 min and then the gas was switched to 500 ppm NO + 5 vol% O2, in order to collect the changes of the pre-adsorbed NH3 species. By altering the sequence of gas introduction, the spectrum corresponding to the process where NO & O2 are first adsorbed, followed by the introduction of NH3 for the reaction, was obtained.


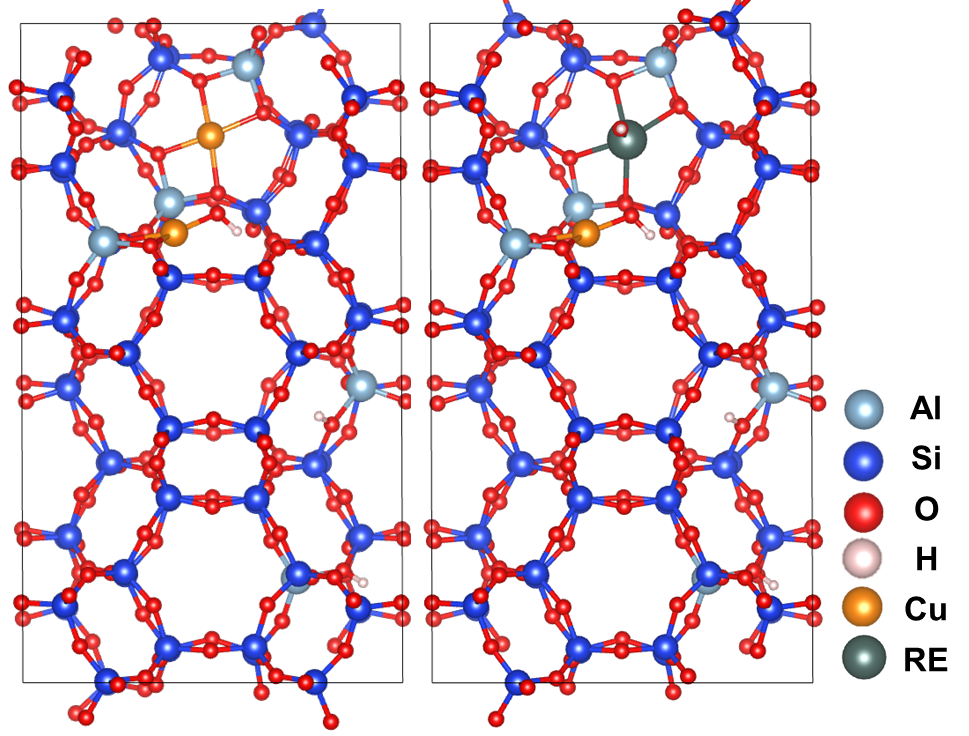


**Fig. S1.** Structural schematics of various RECuSSZ-13 catalysts.


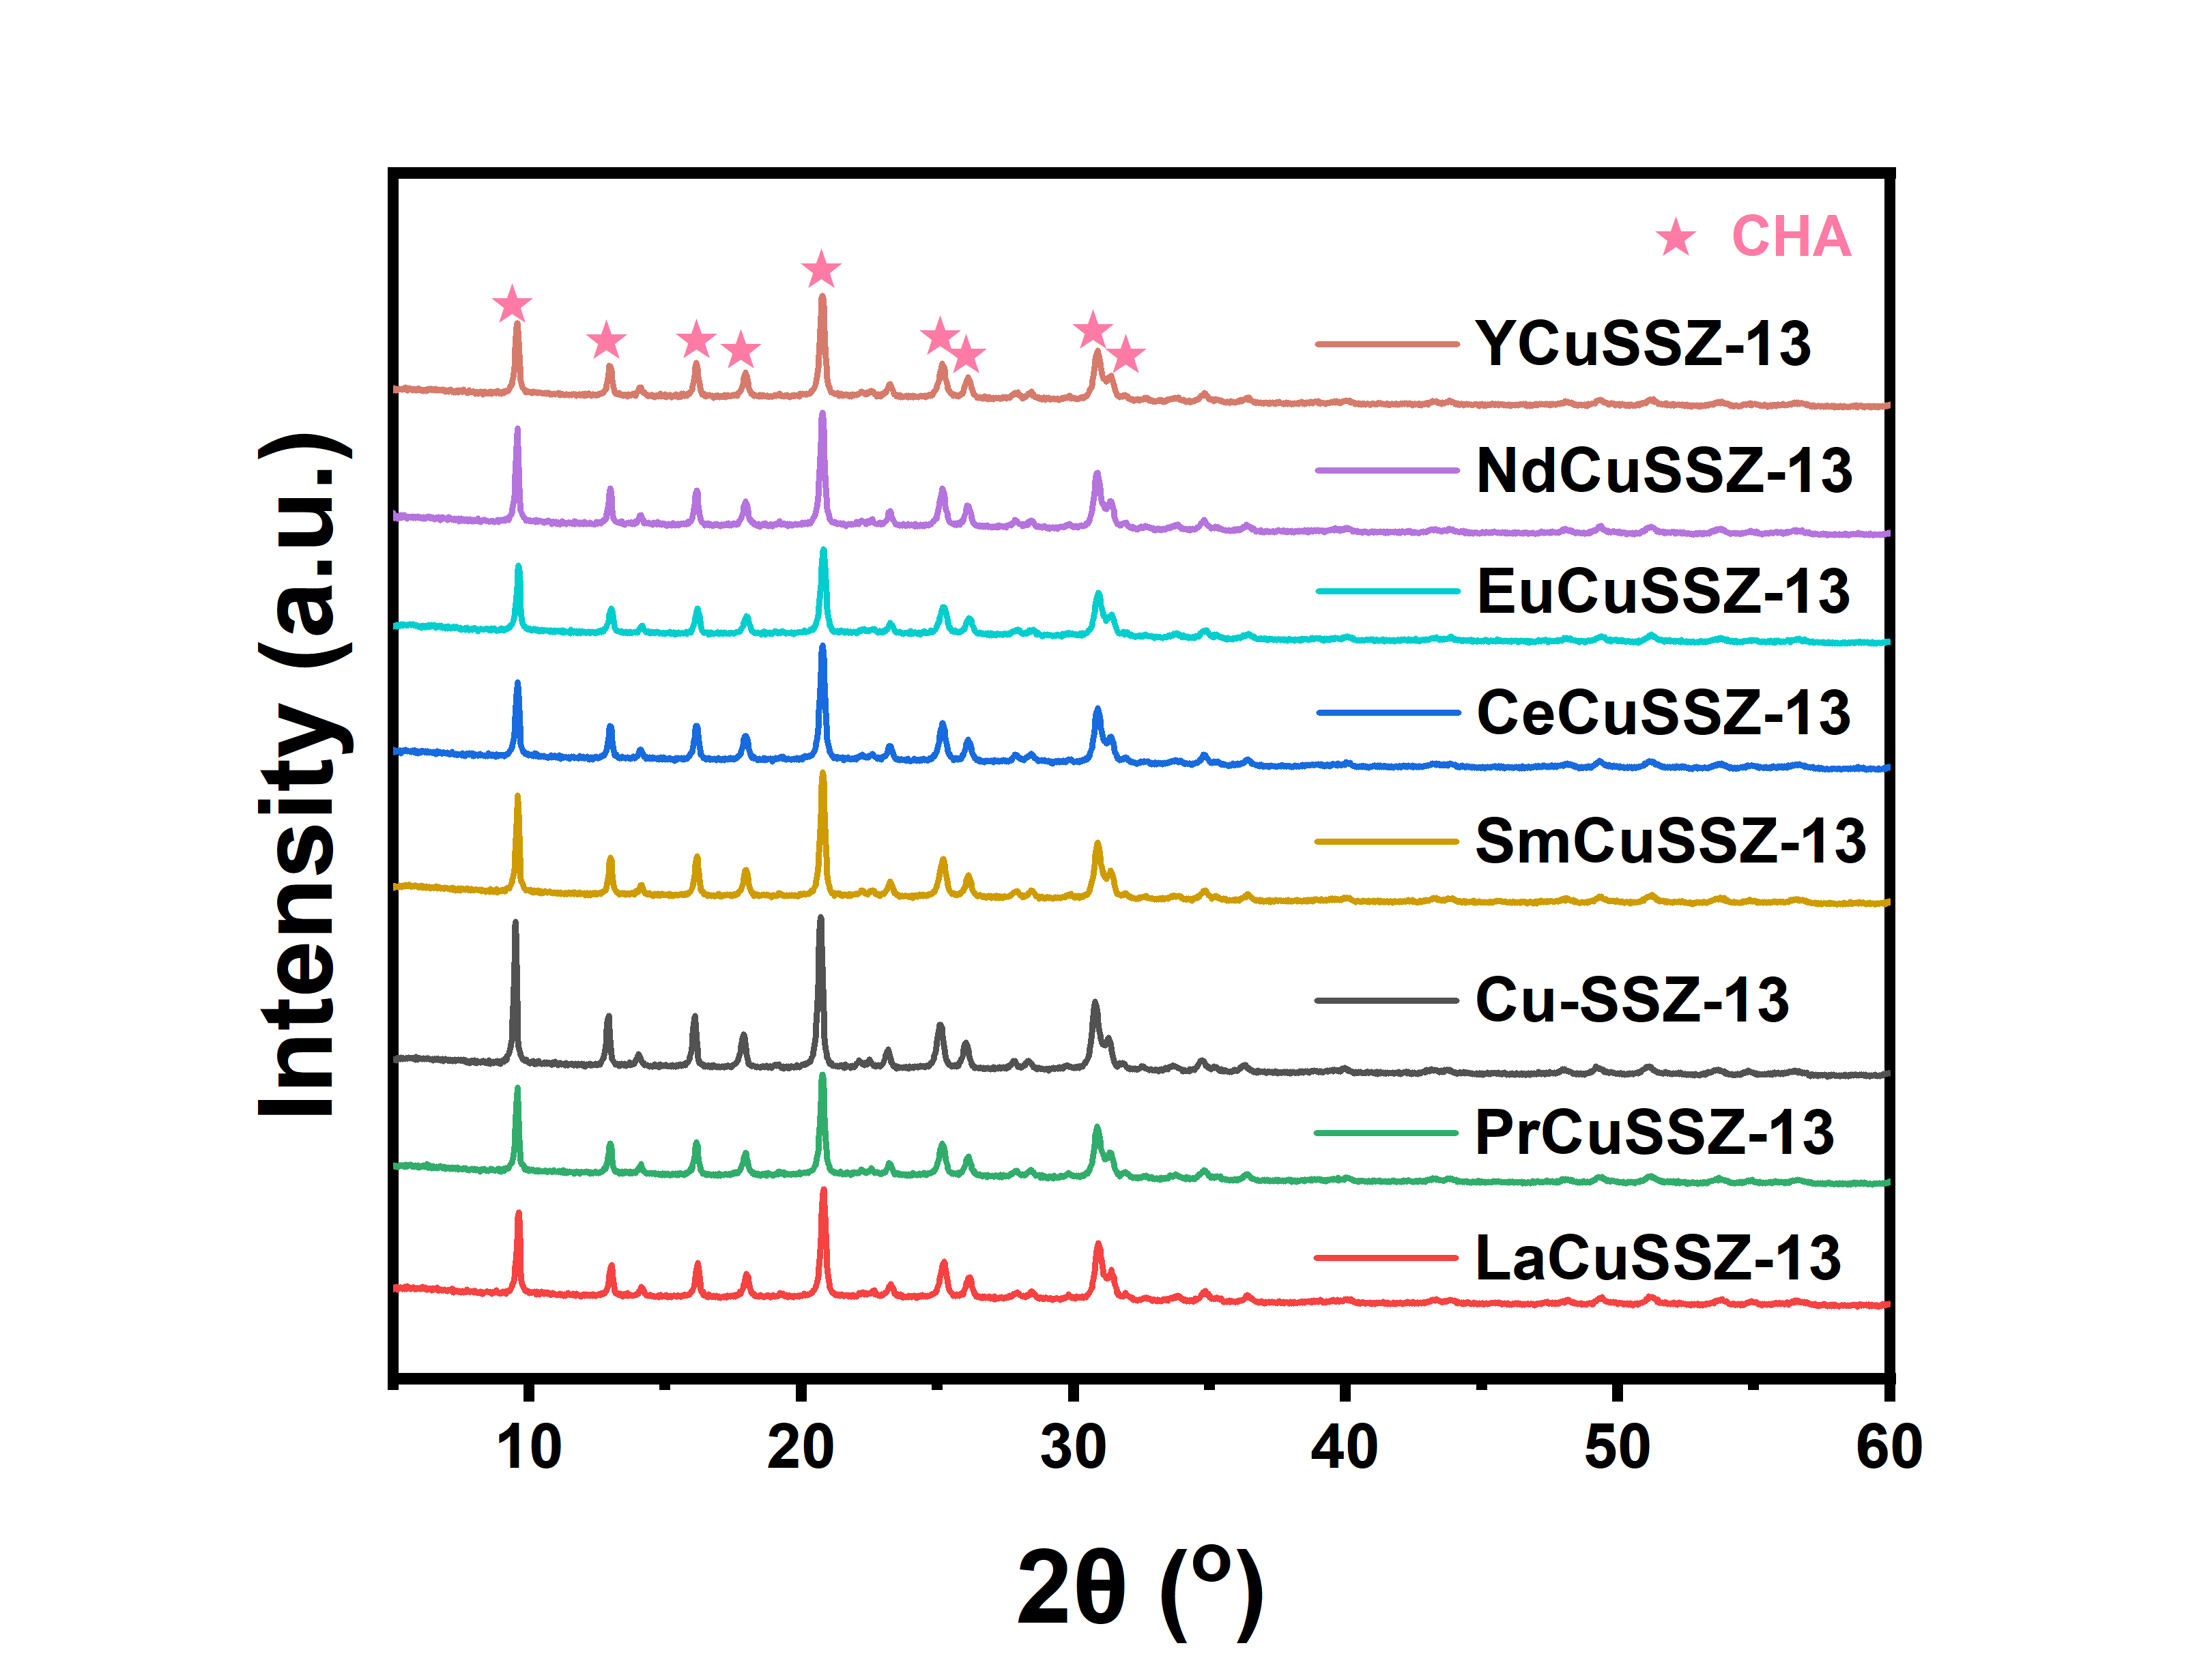


**Fig. S2.** XRD patterns of Cu-SSZ-13 and RECuSSZ-13 catalysts.

**
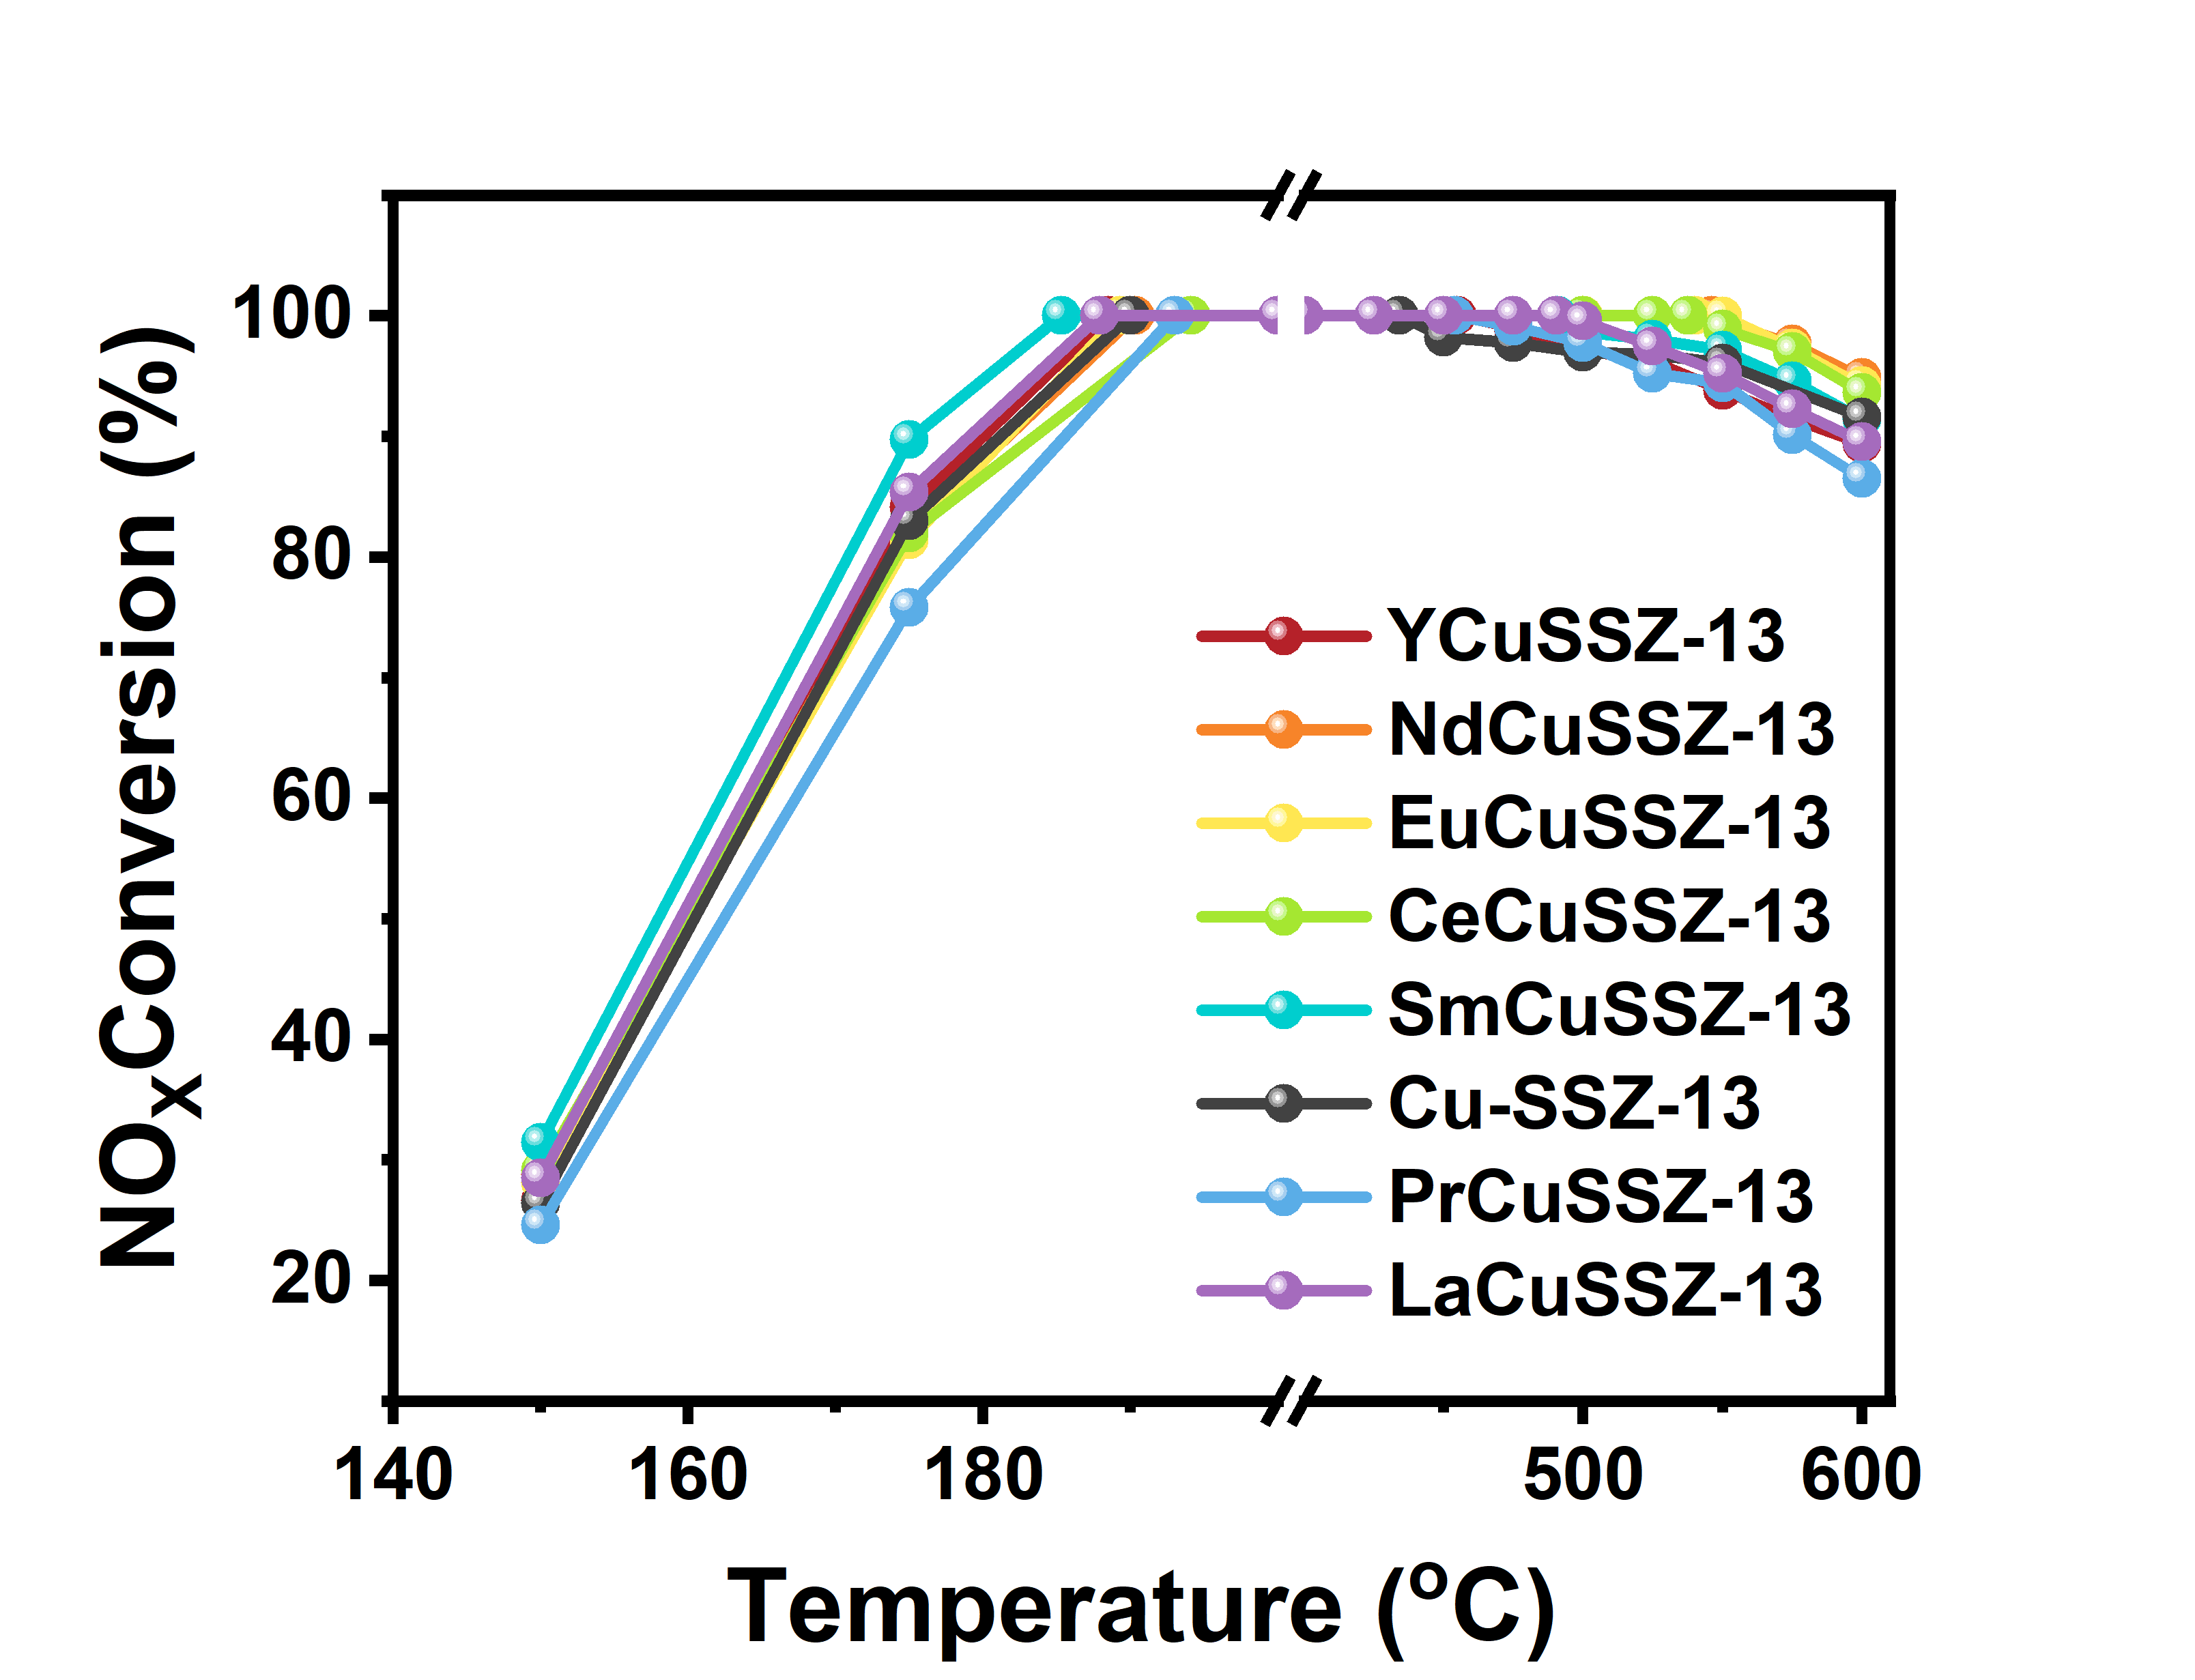
**

**Fig. S3.** NO*x* conversion of Cu-SSZ-13 and RECuSSZ-13 samples.


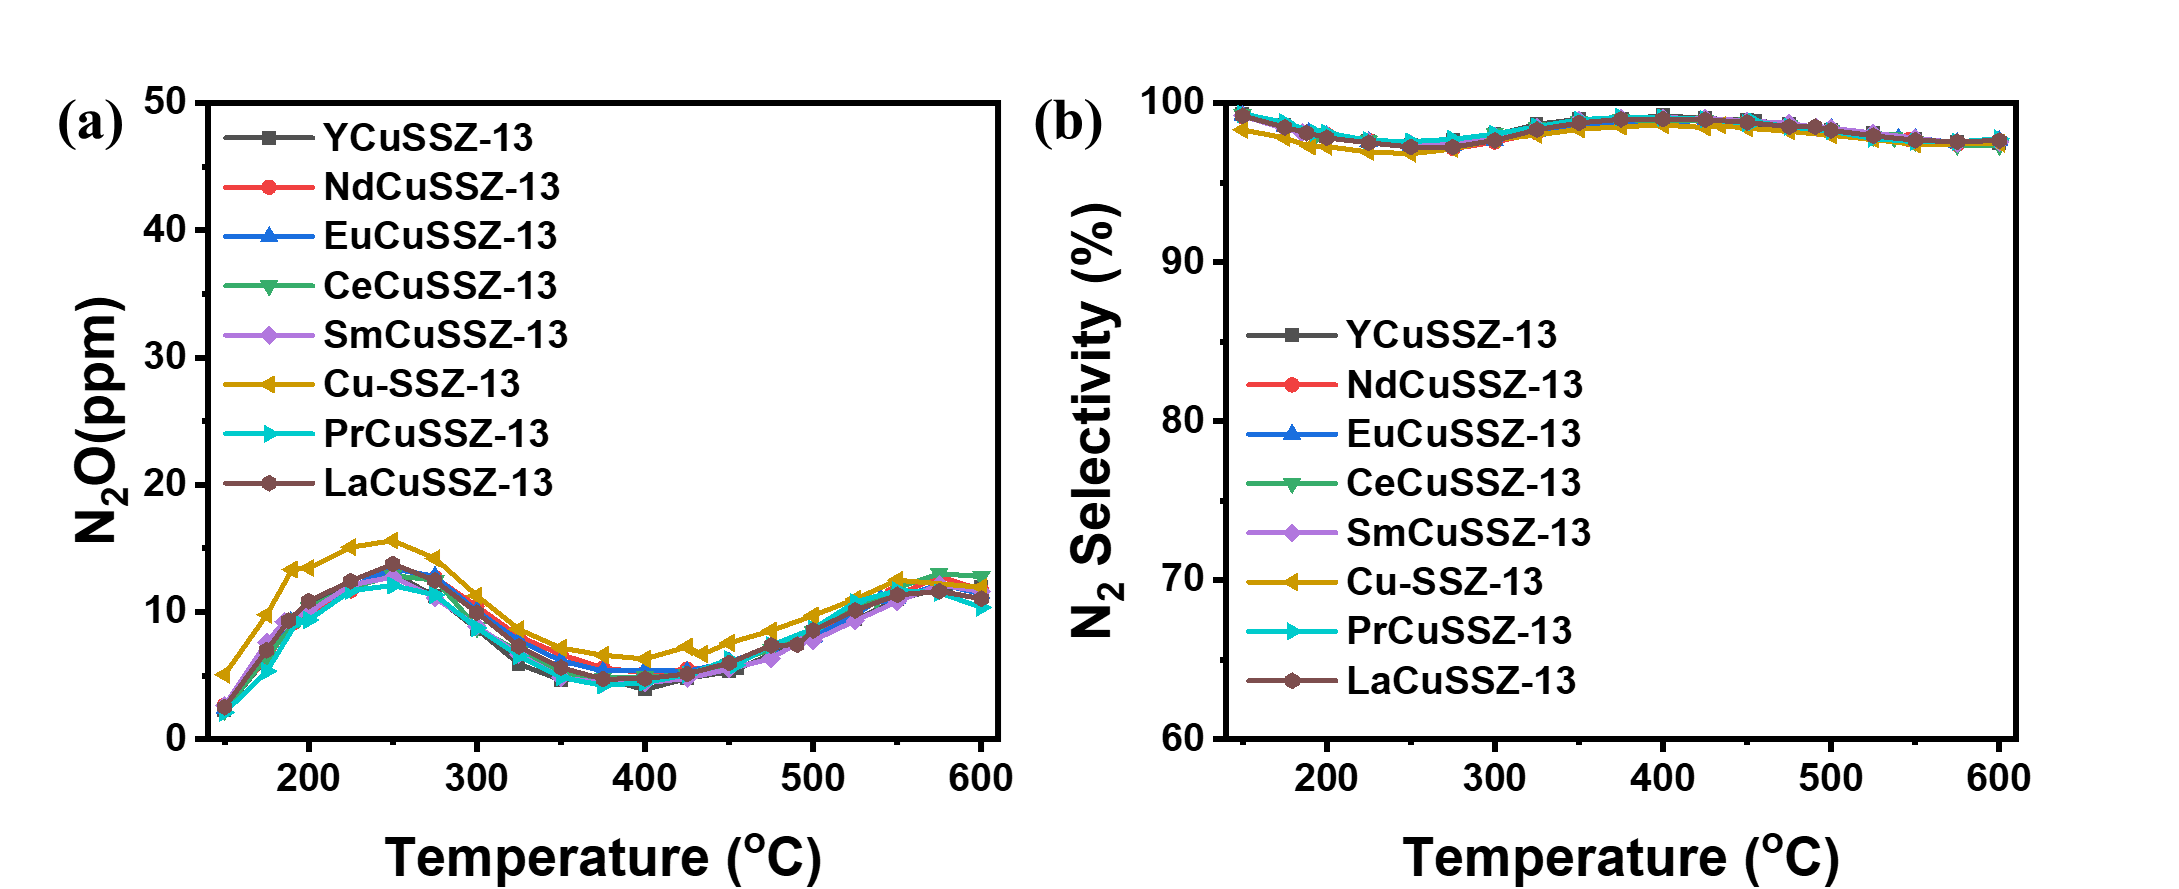


Fig. S4. (a) N2O formation and (b) N2 selectivity of Cu-SSZ-13 and RECuSSZ-13 catalysts. Reaction conditions: 500 ppm NO, 500 ppm NH3, 10% O2, and 5% H2O, balance N2; GHSV = 100000 h−1.

**
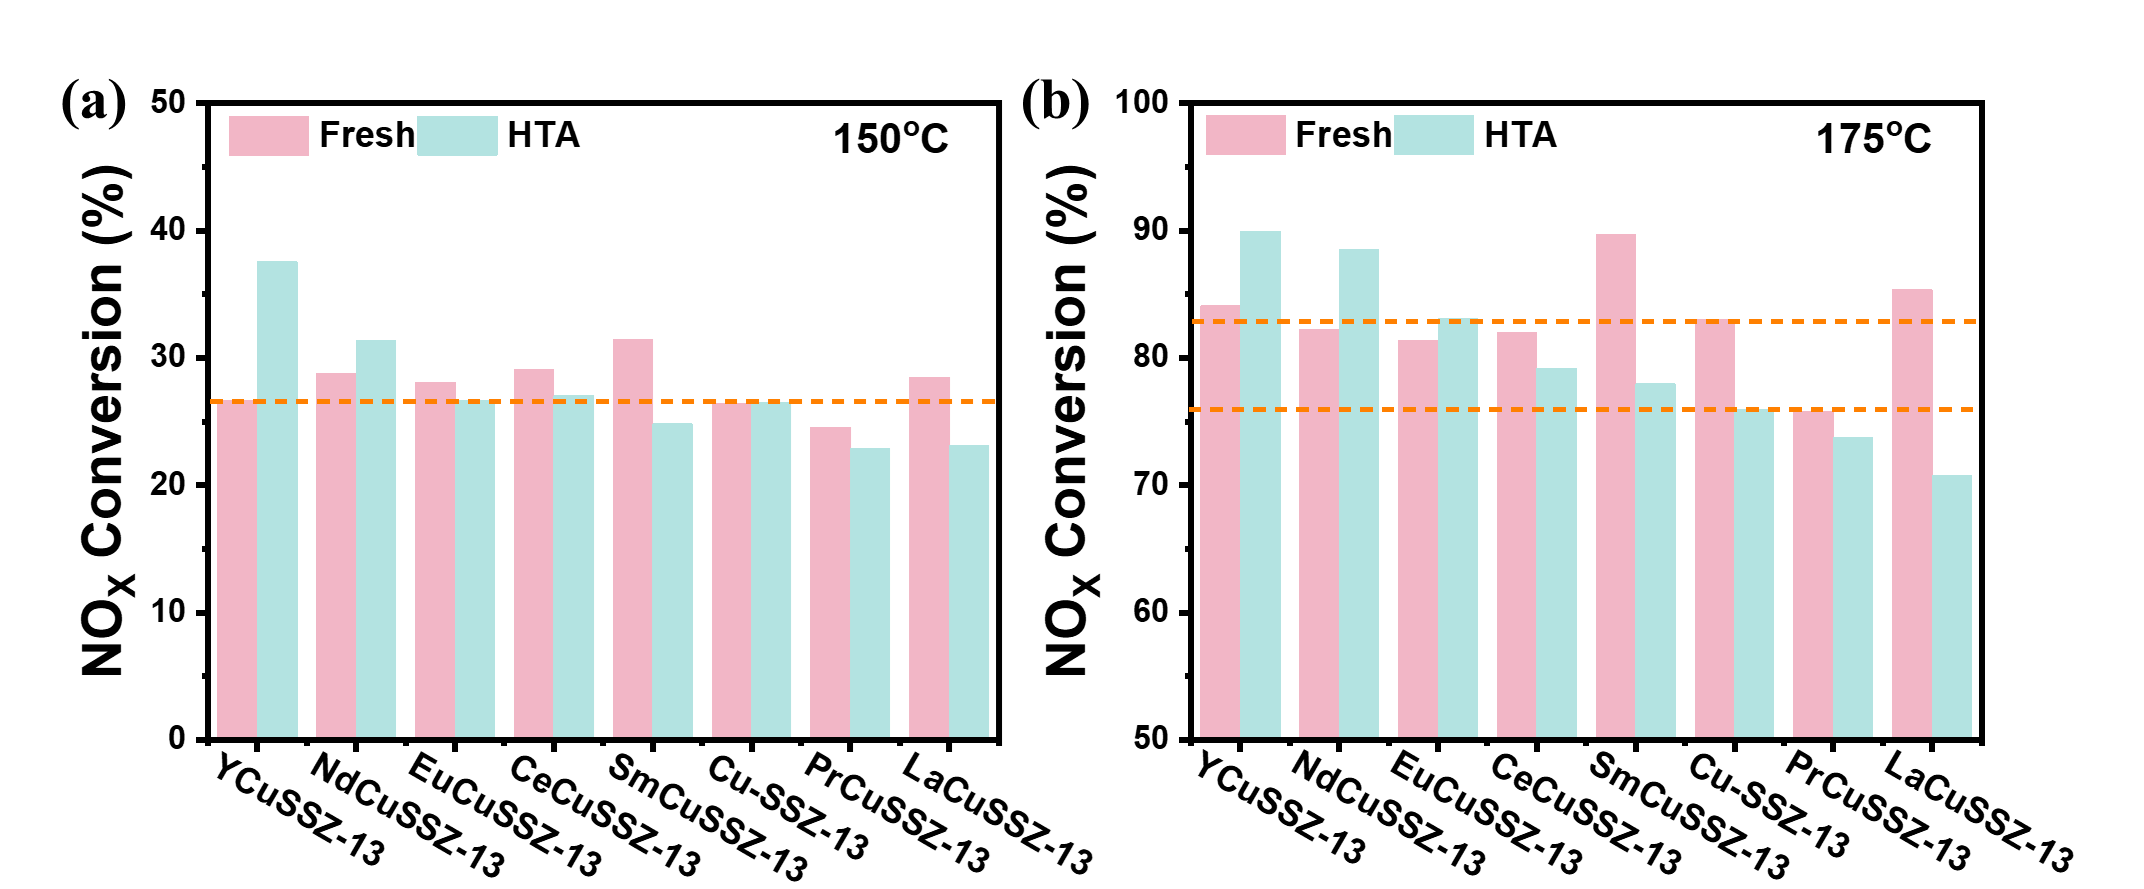
**

Fig. S5.NO*x* conversions at 150 ℃ (a) and 175 ℃ (b) over Cu-SSZ-13 and RECuSSZ-13 samples before and after high-temperature hydrothermal ageing.


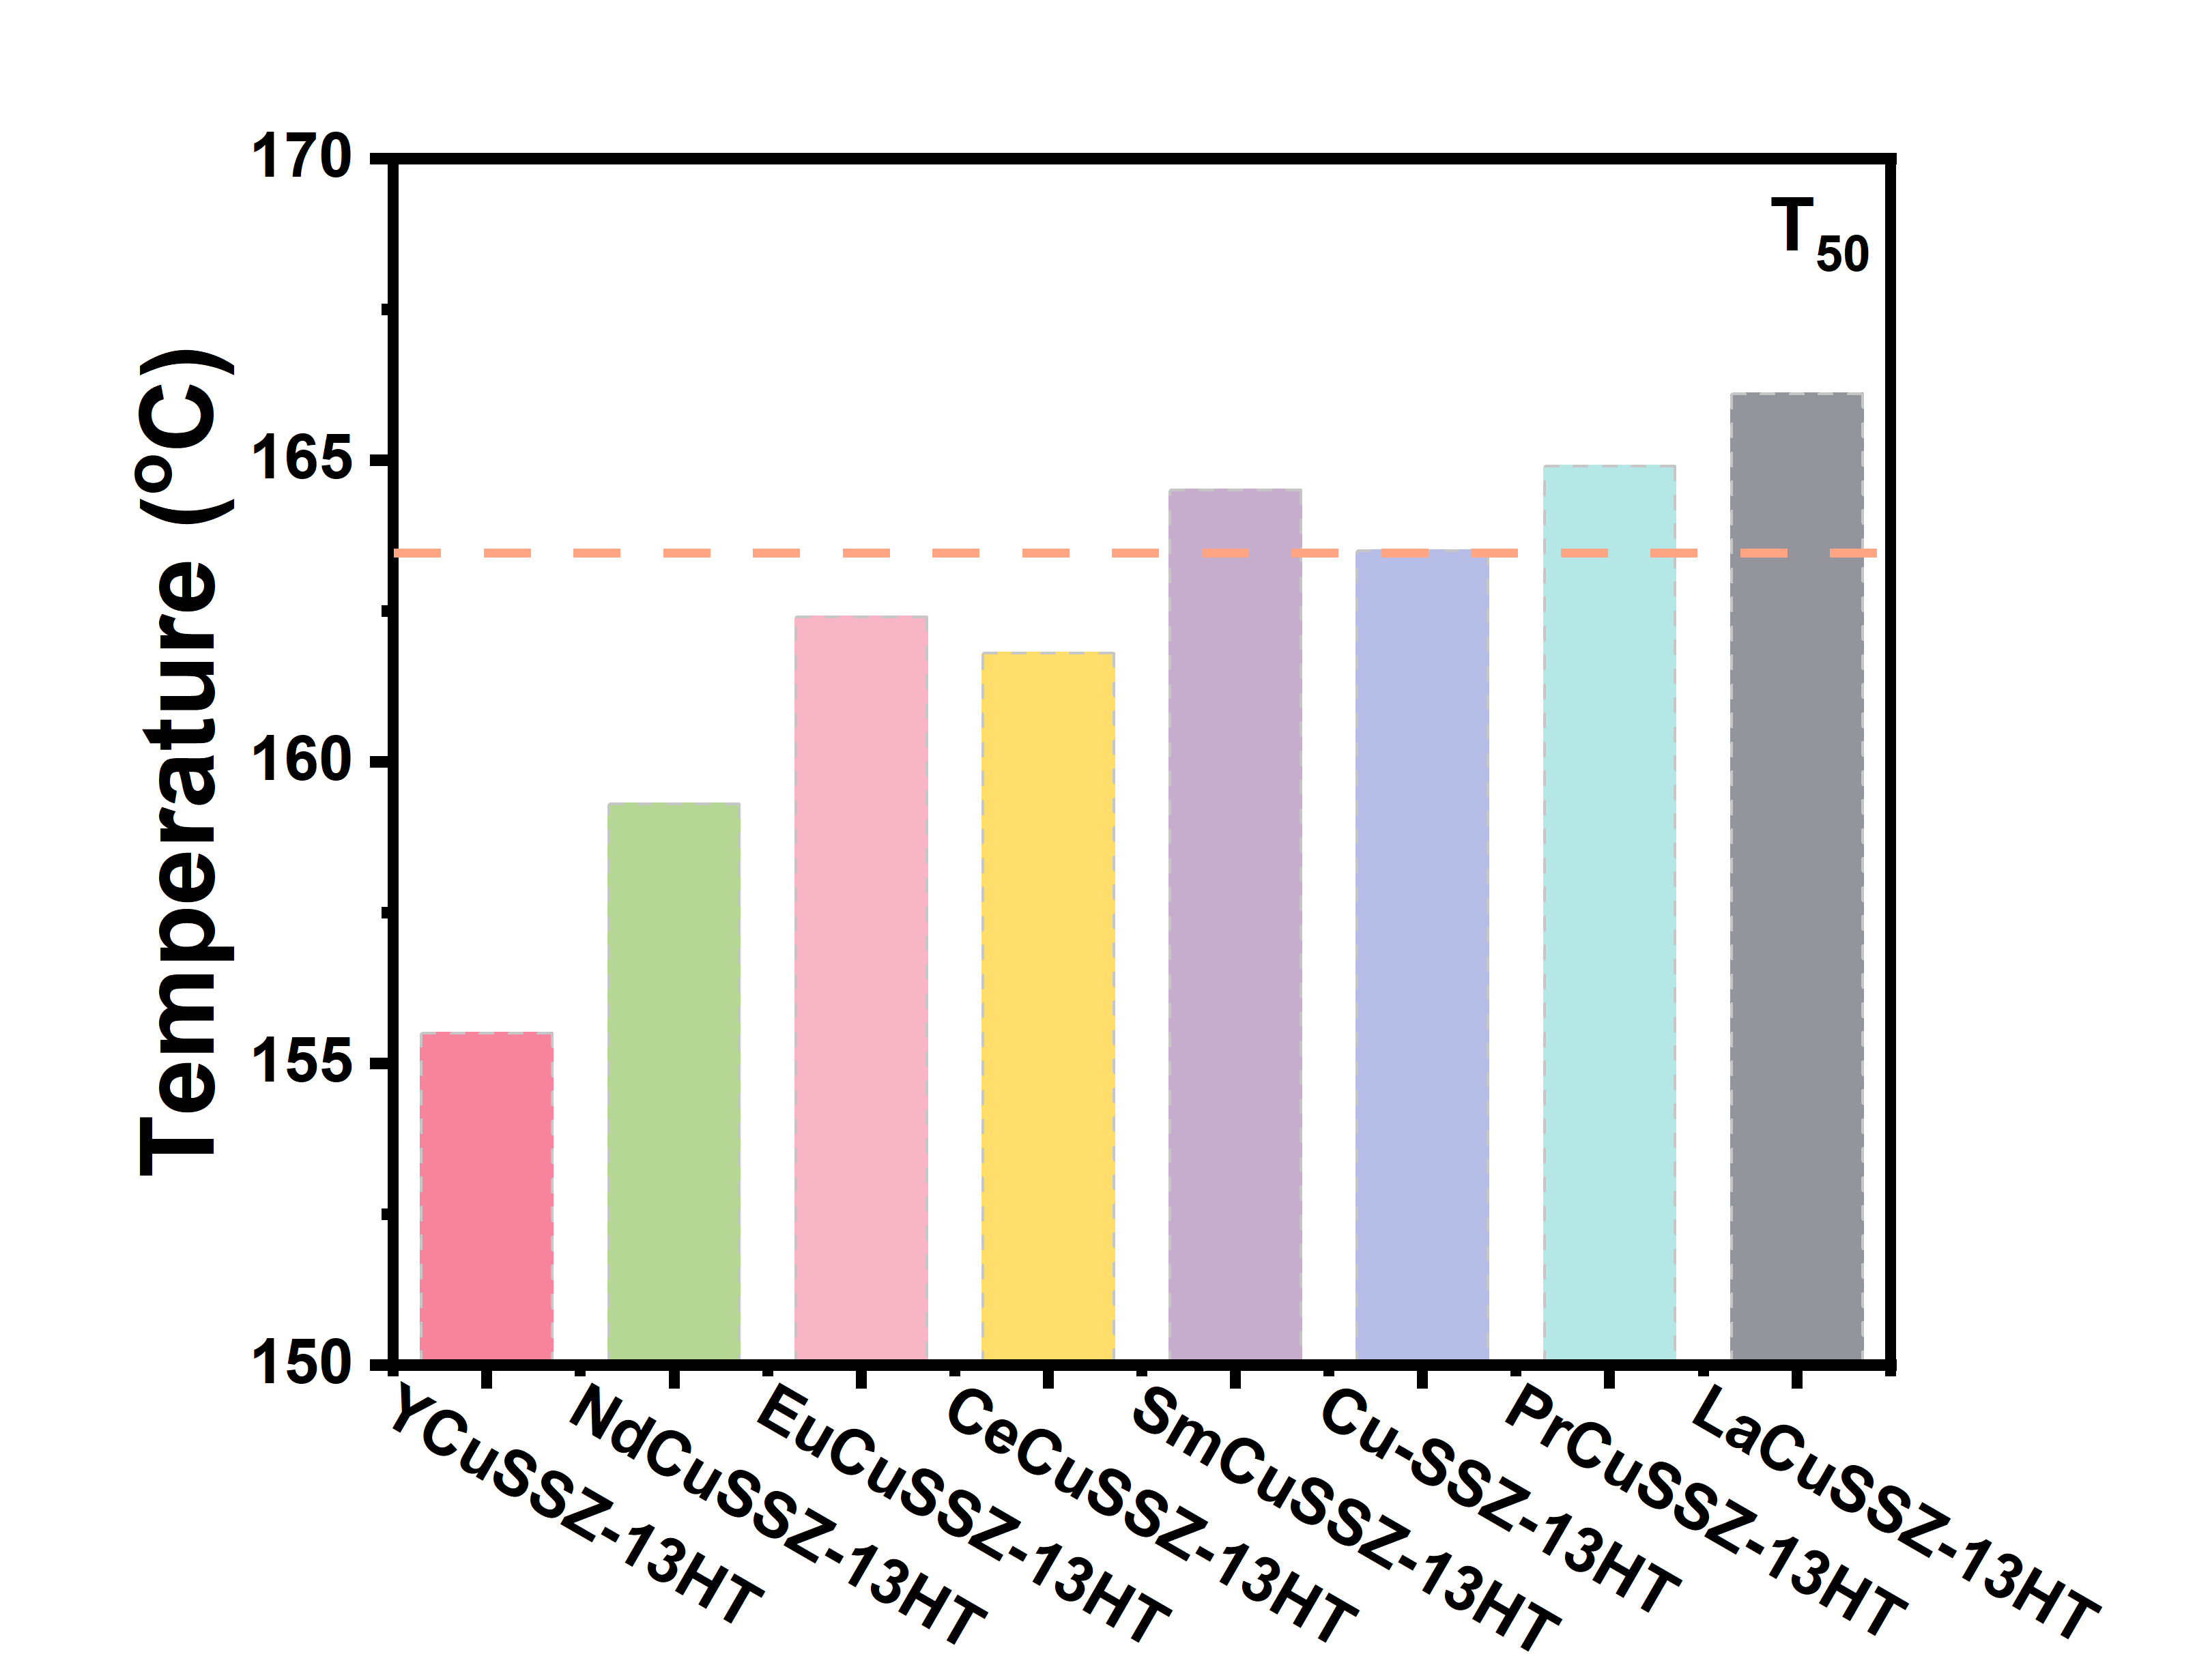


Fig. S6. Comparison of the T50 values for Cu-SSZ-13HT and RECuSSZ-13HT samples**.**

**
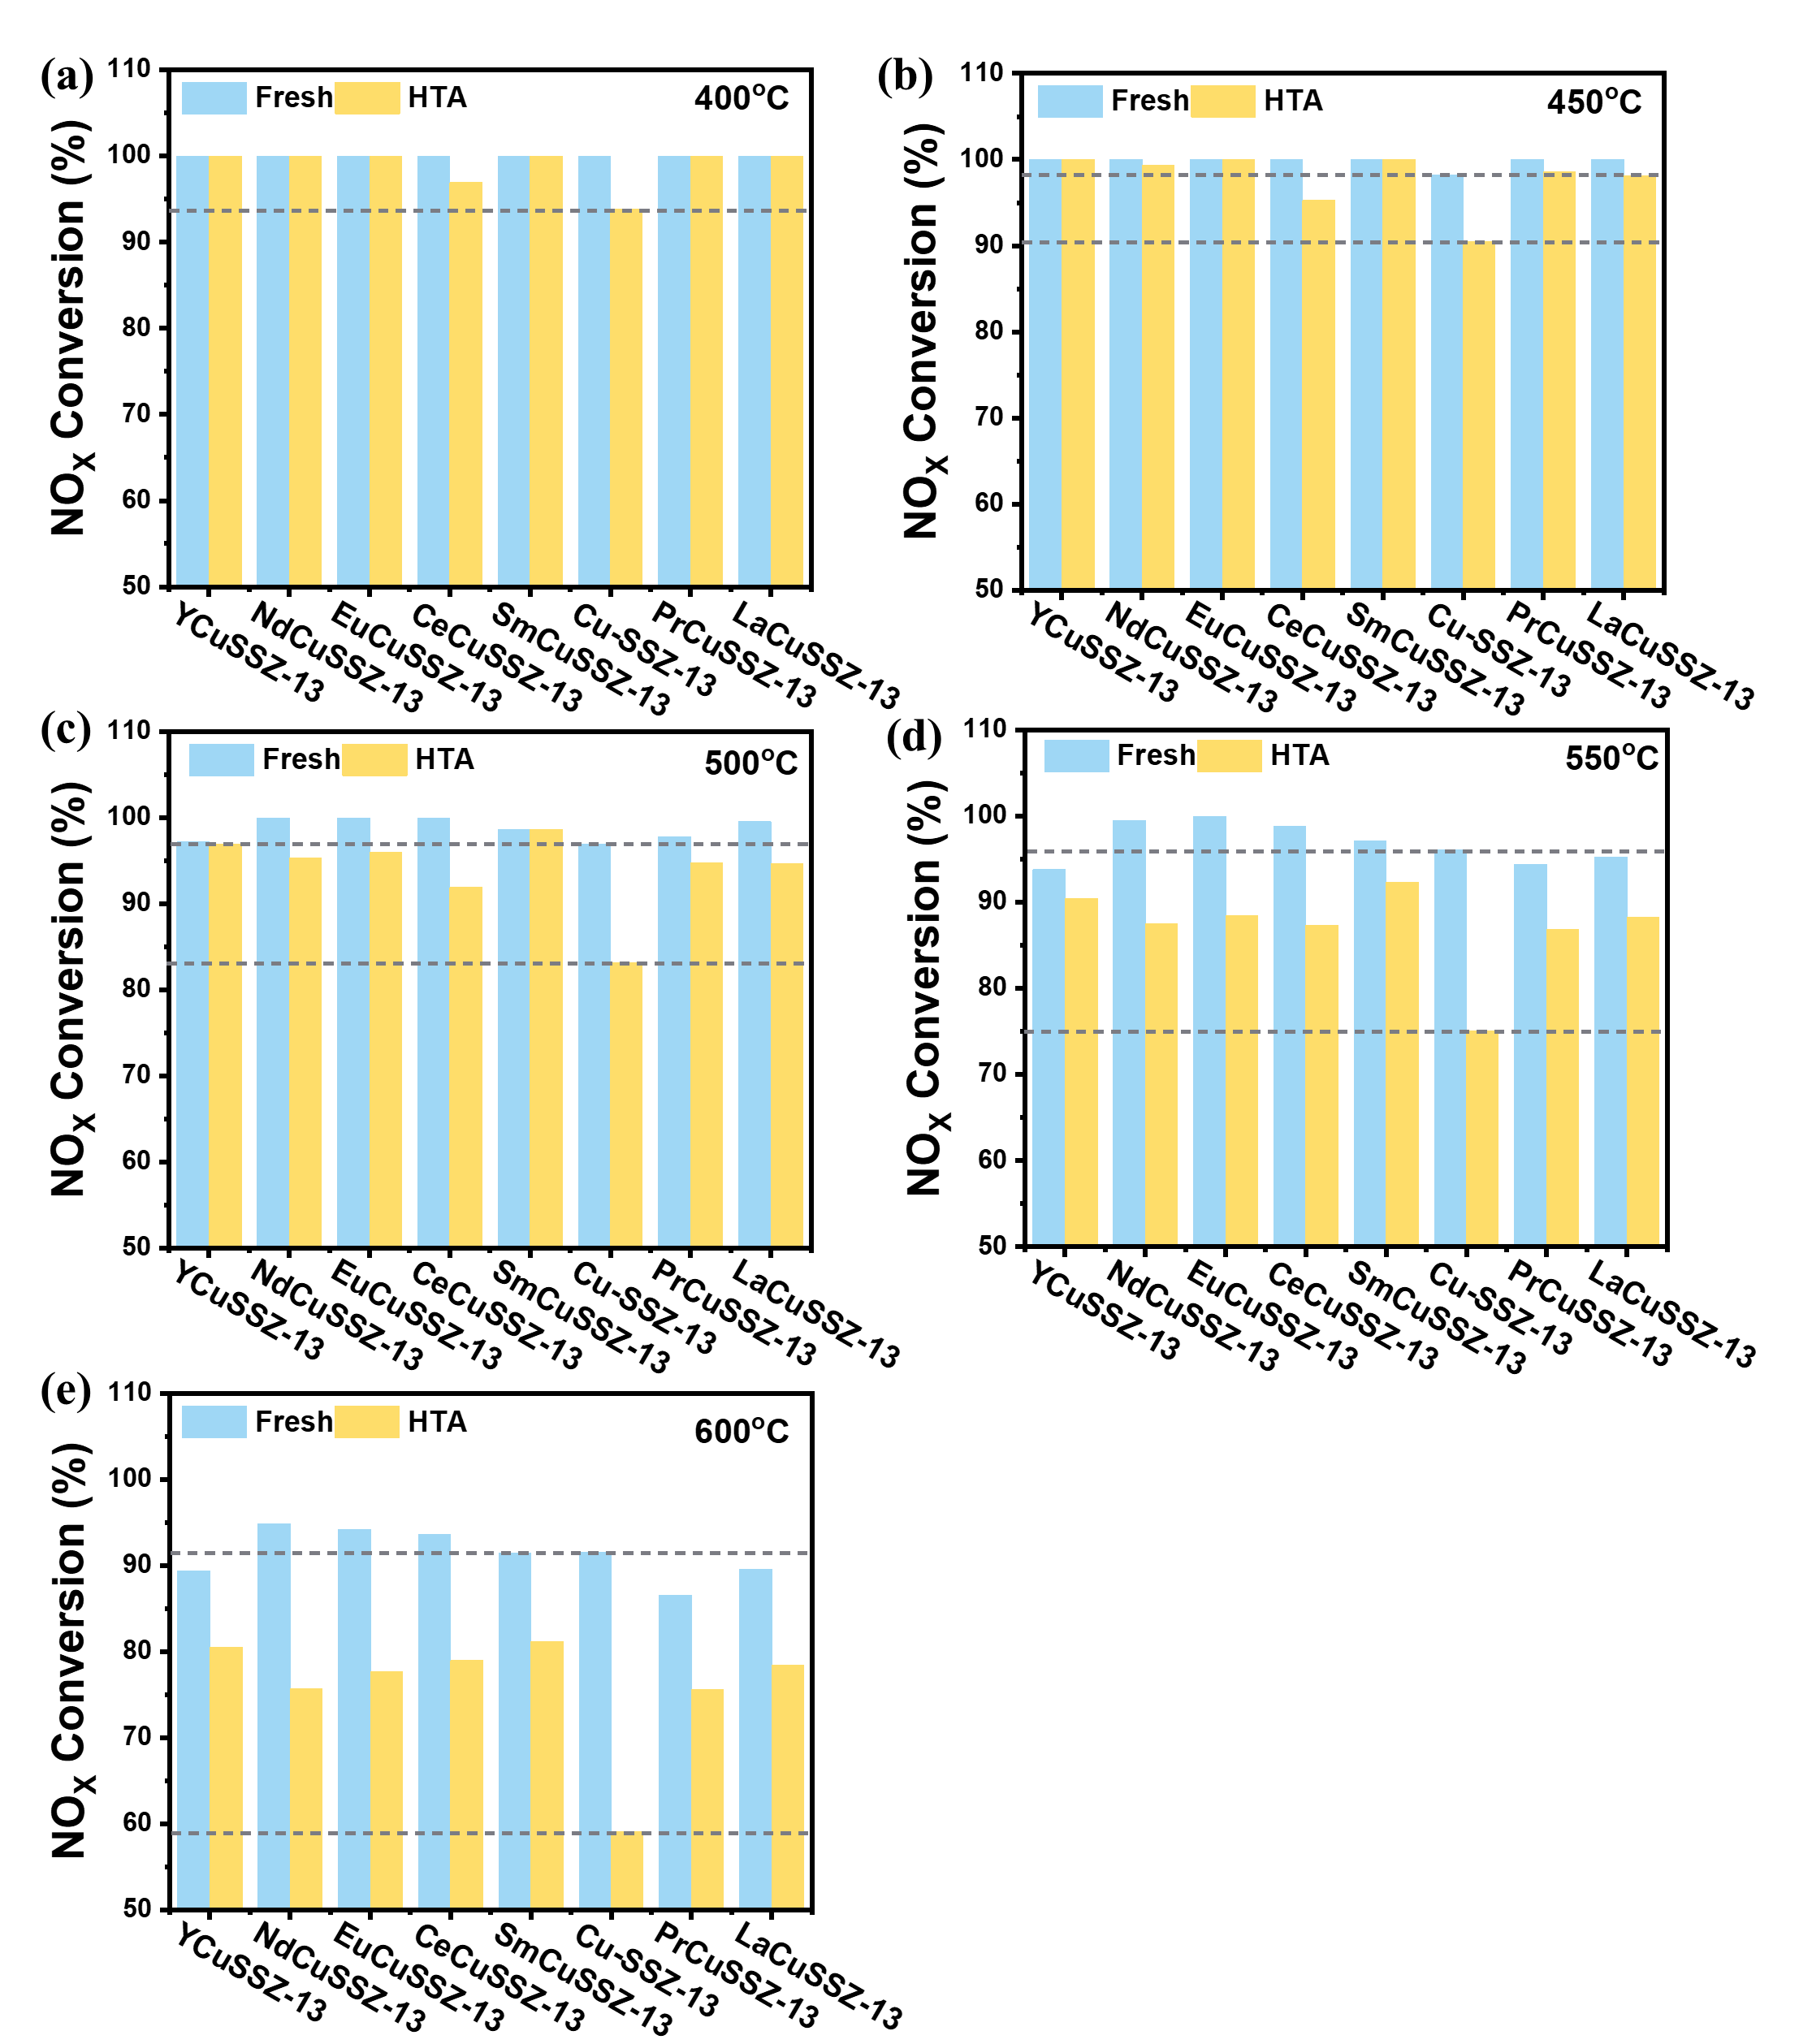
**

Fig. S7.NO*x* conversions at 400~600 ℃ over Cu-SSZ-13 and RECuSSZ-13 samples before and after high-temperature hydrothermal ageing.


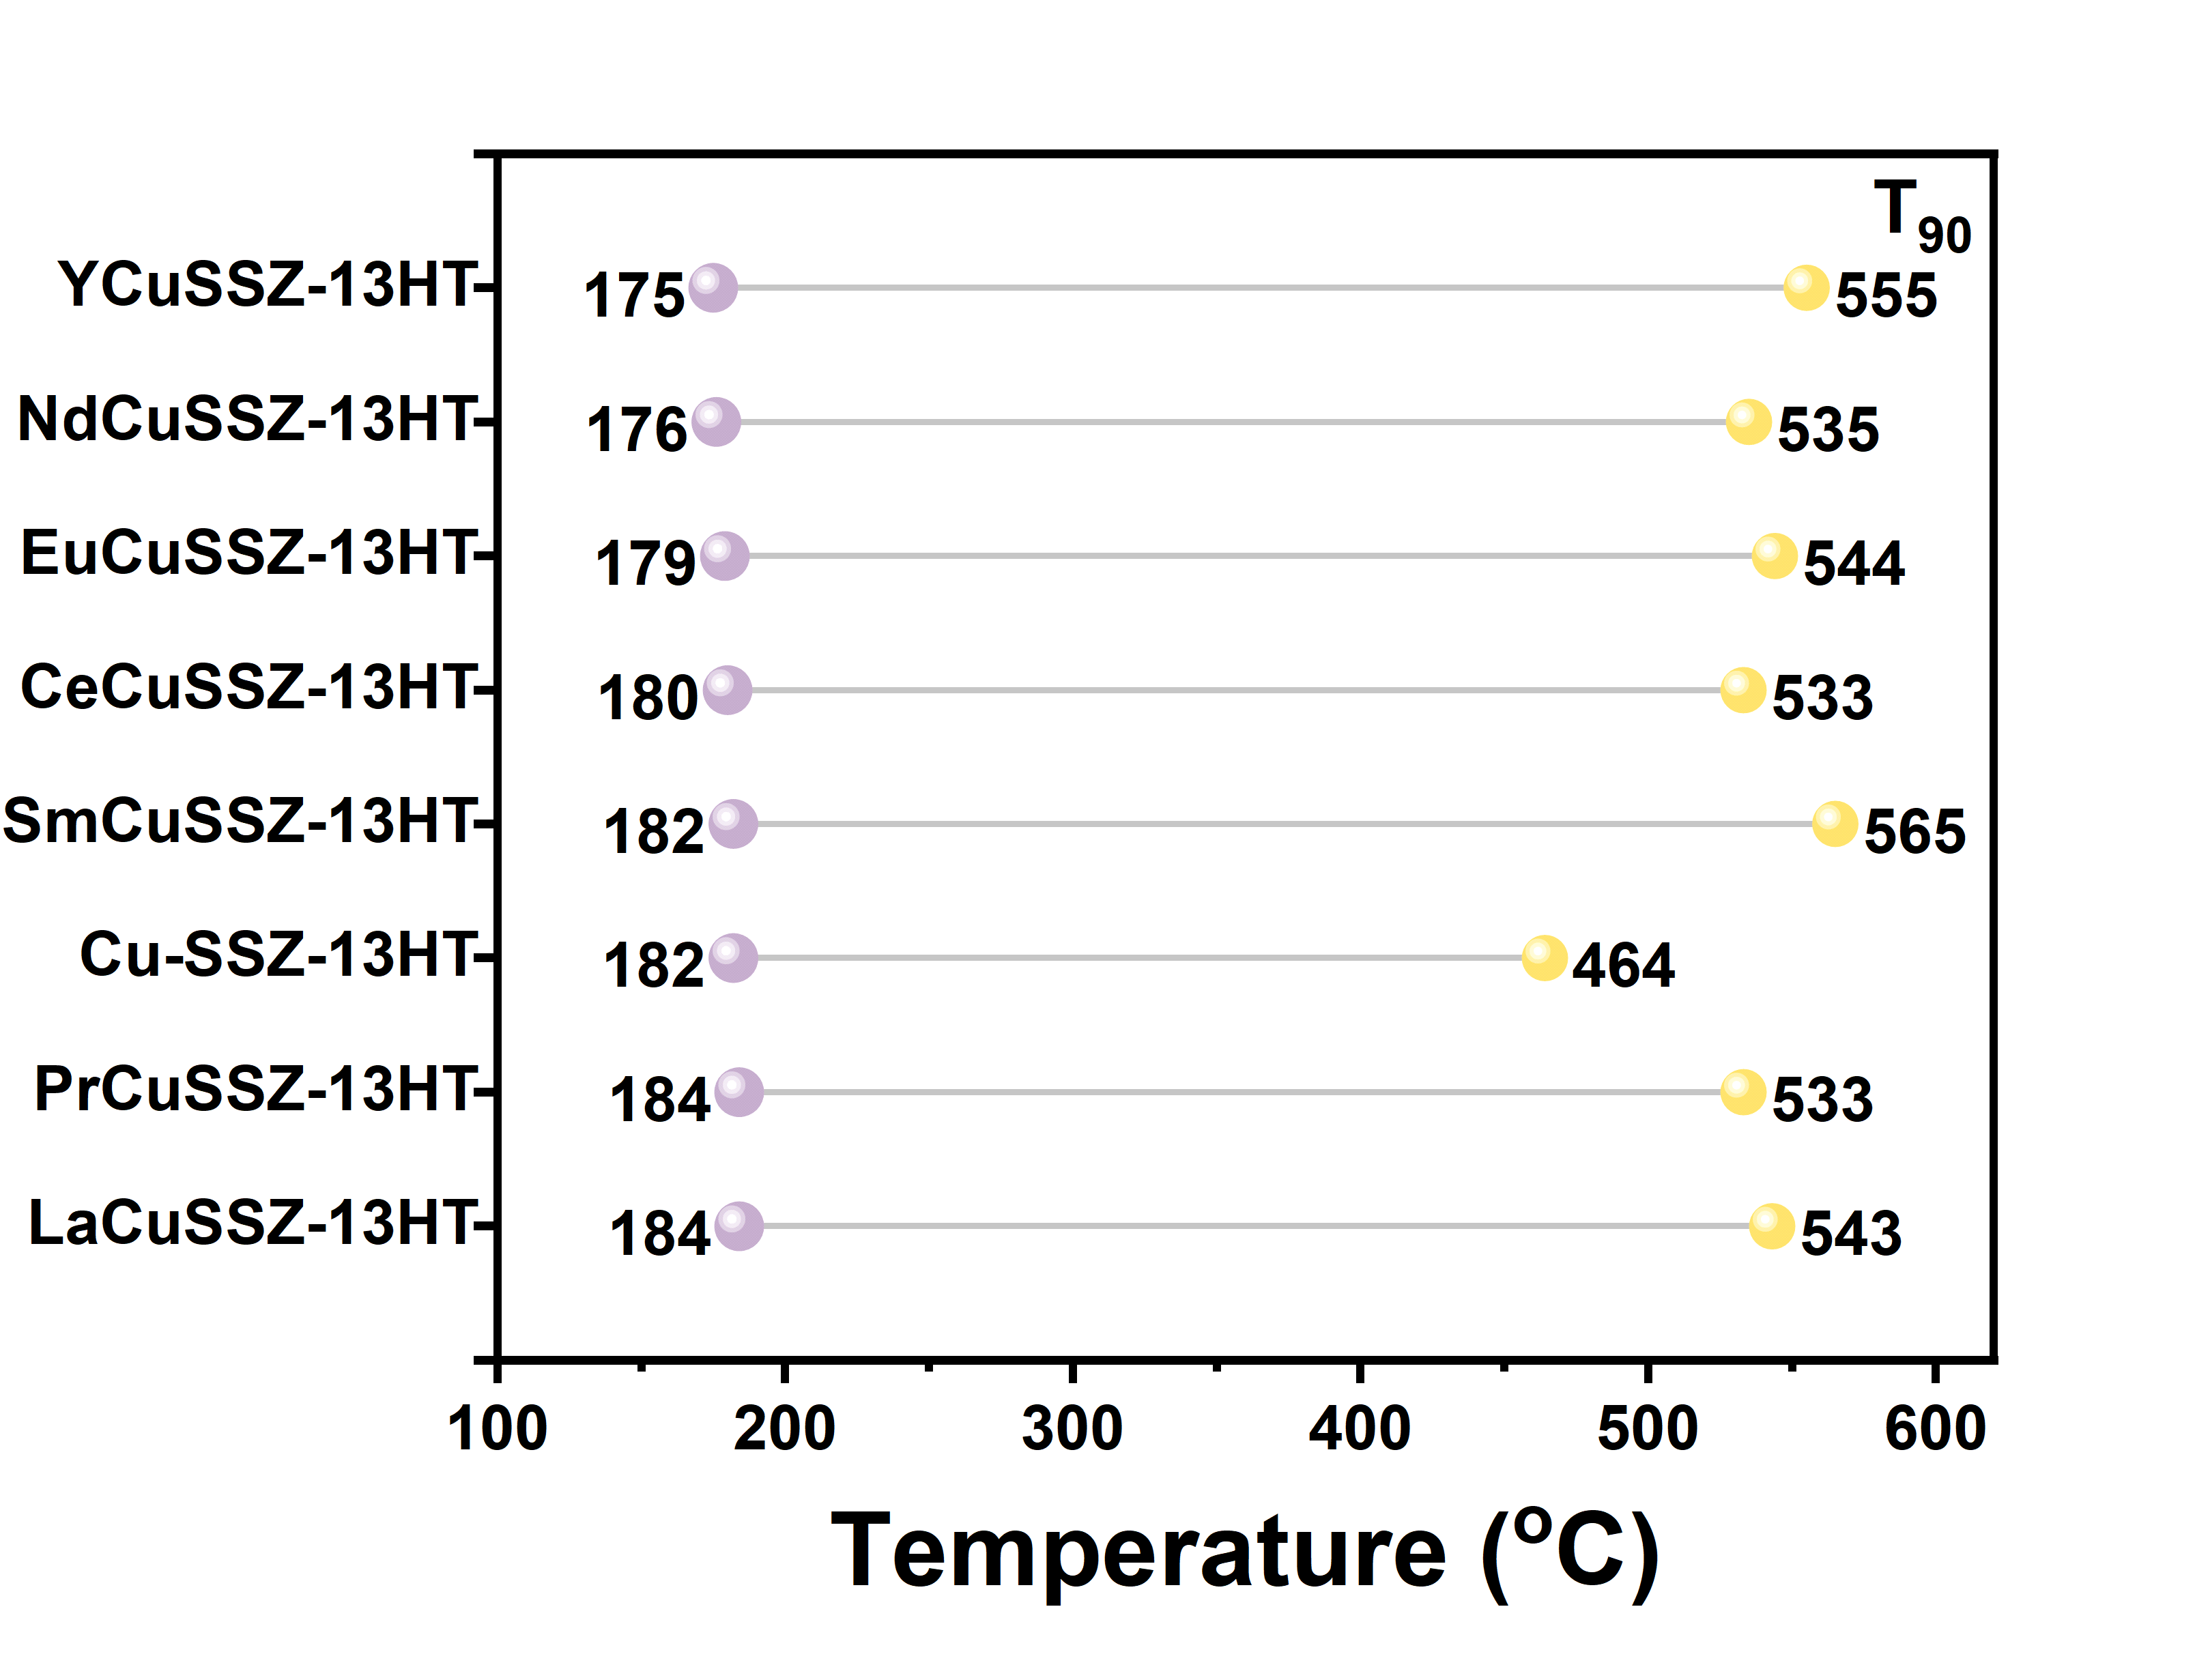


Fig. S8. The corresponding T90 temperature window of Cu-SSZ-13HT and RECuSSZ-13HT catalysts.


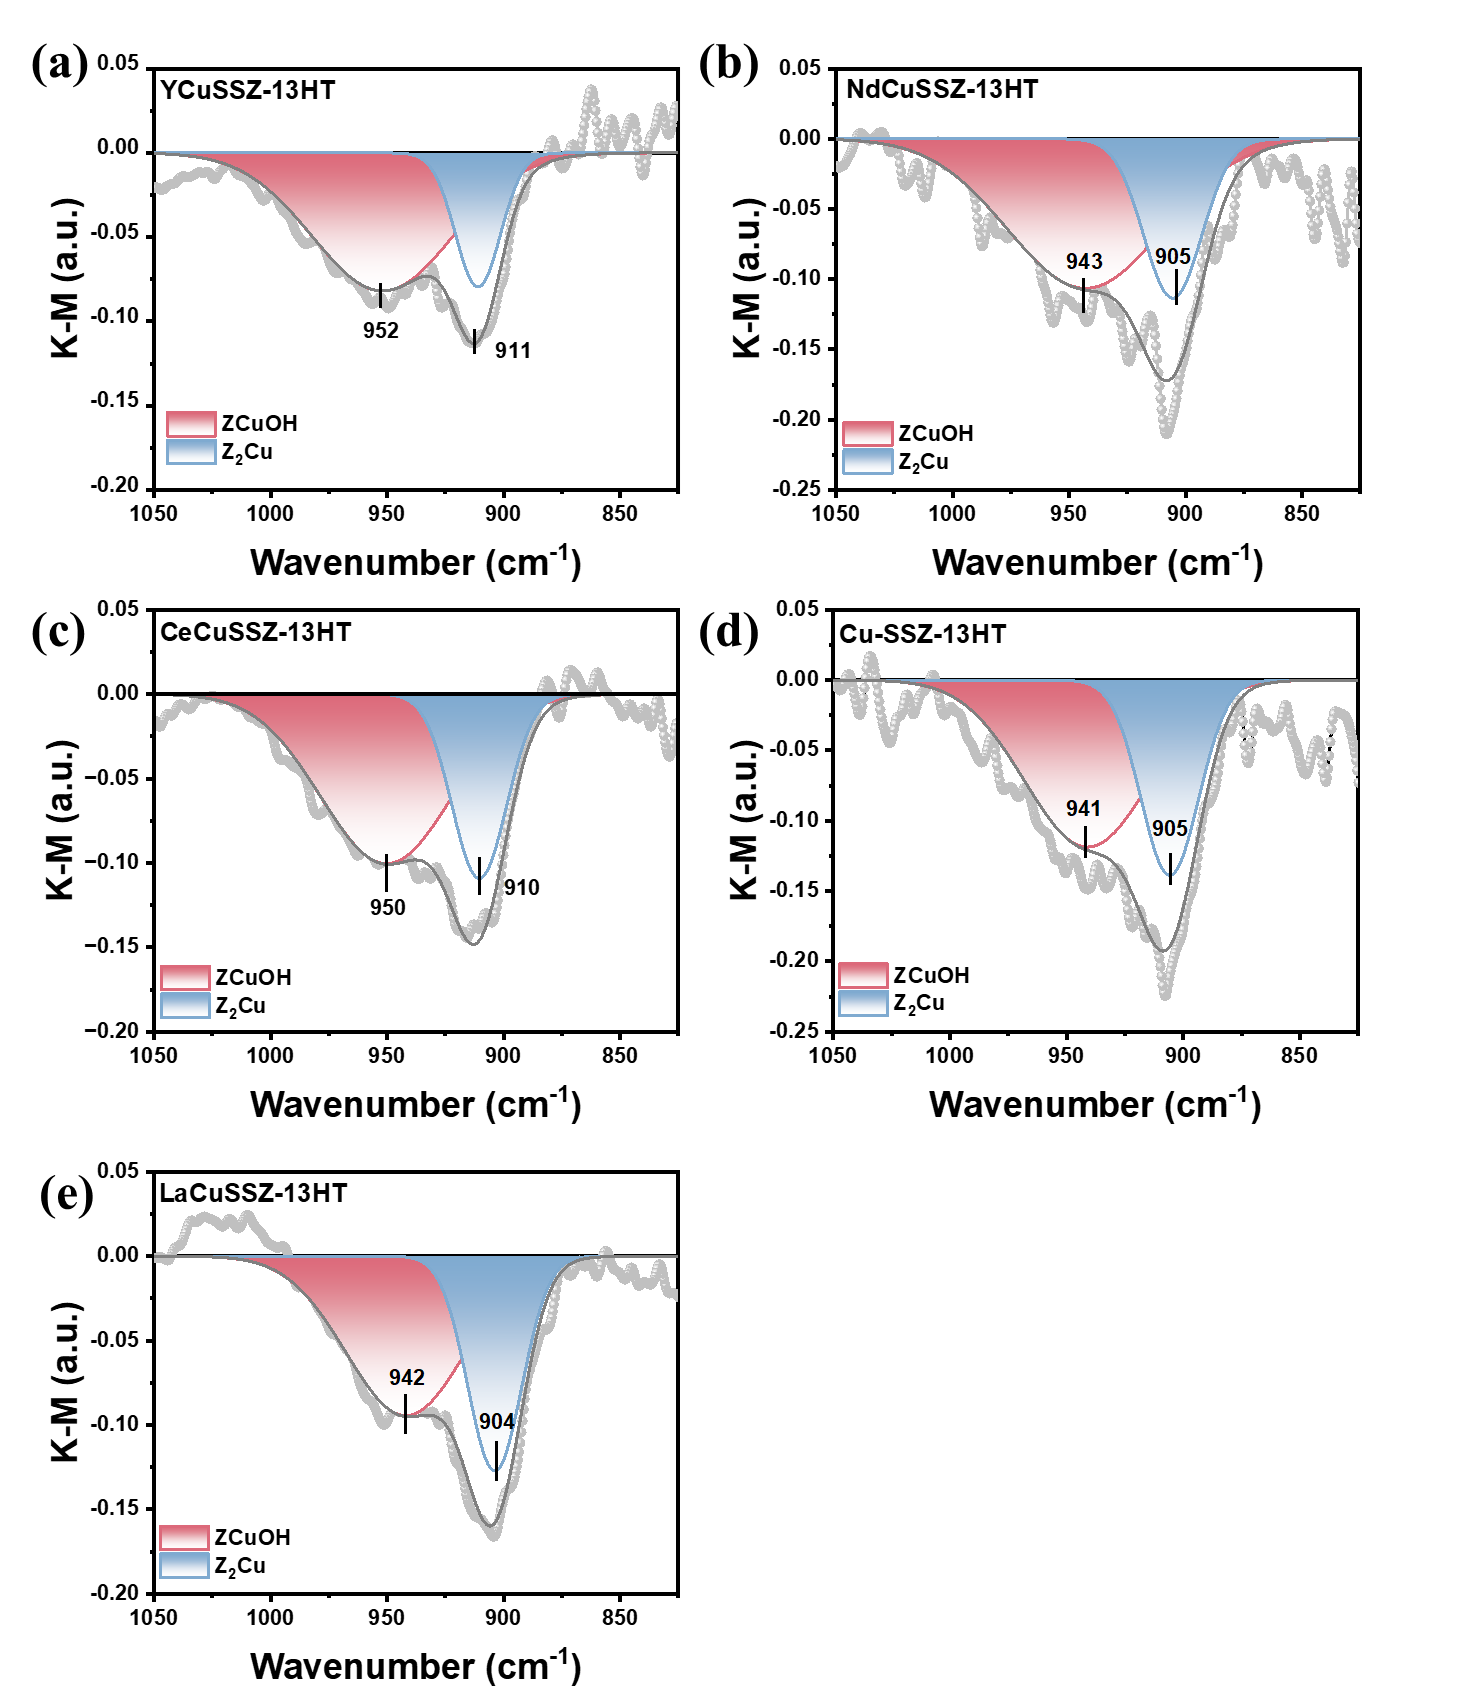


**Fig. S9.** *In situ* DRIFTS spectra after NH3 adsorption saturation (T-O-T vibrations portion) over Cu-SSZ-13HT and RECuSSZ-13HT. Reaction conditions: 500 ppm NH3 balanced with N2.

**
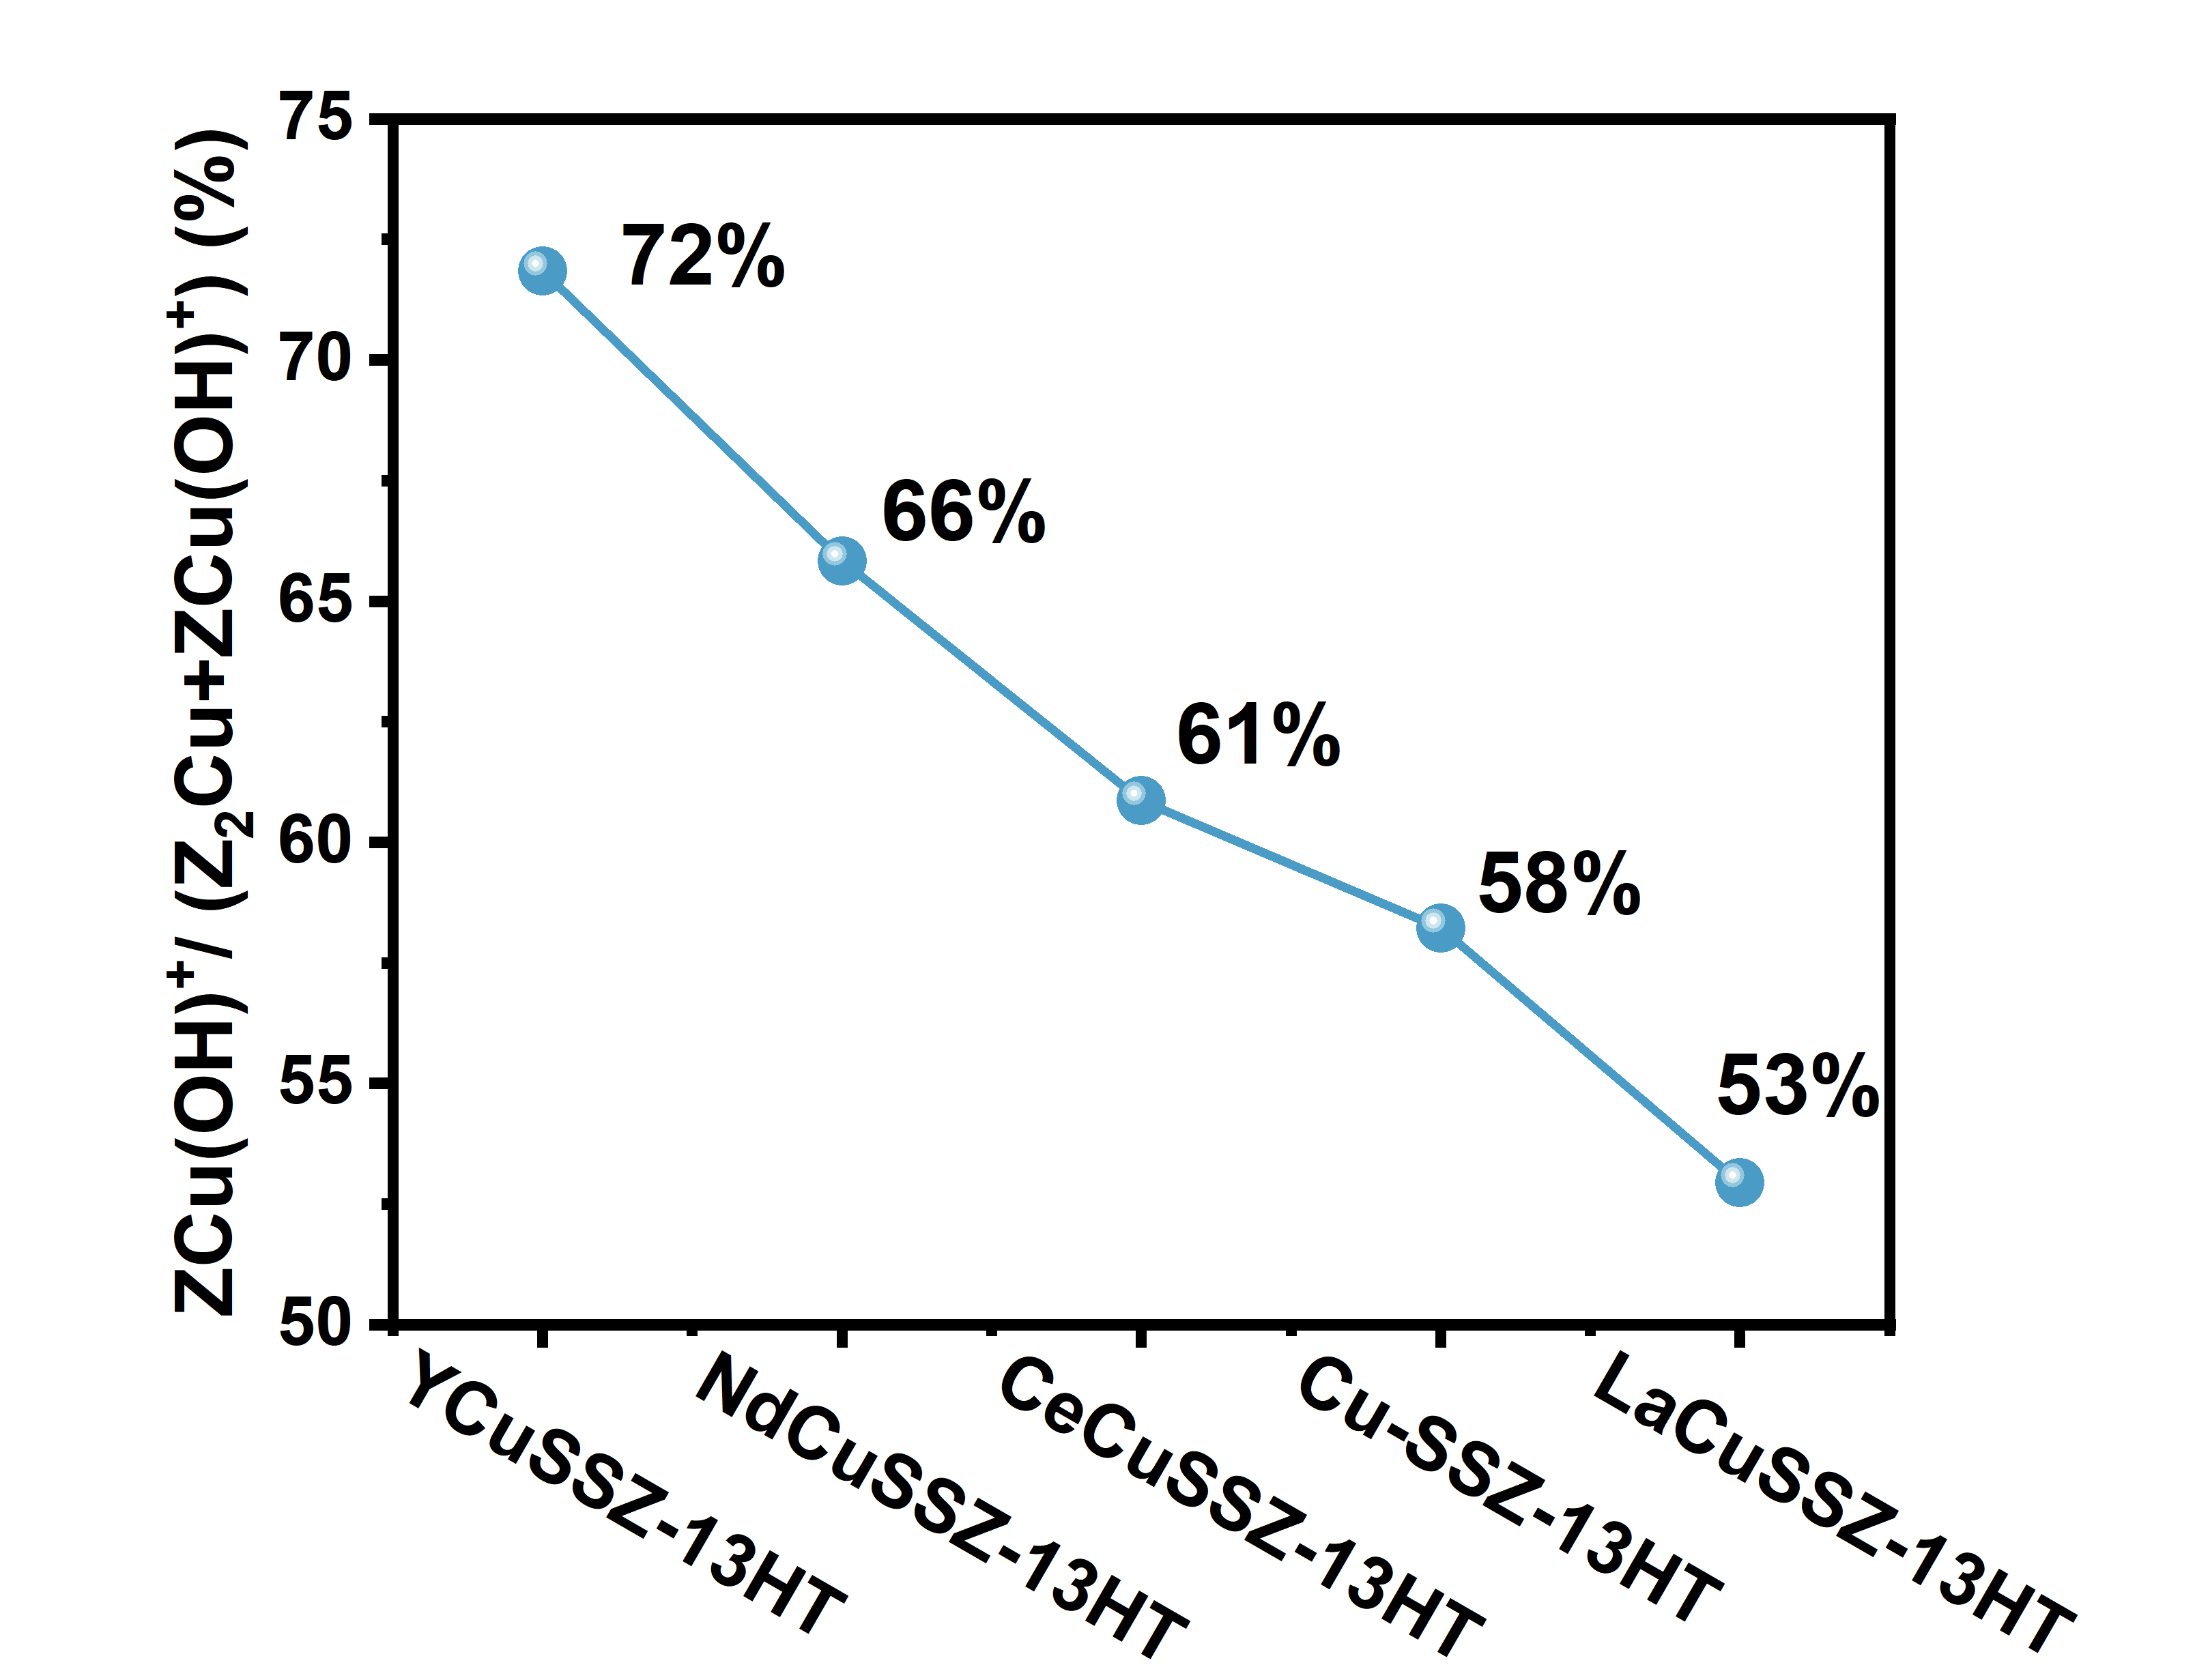
**

Fig. S10. The percentage of ZCu(OH)+ based on quadratic integration of H2-TPR profiles.

**
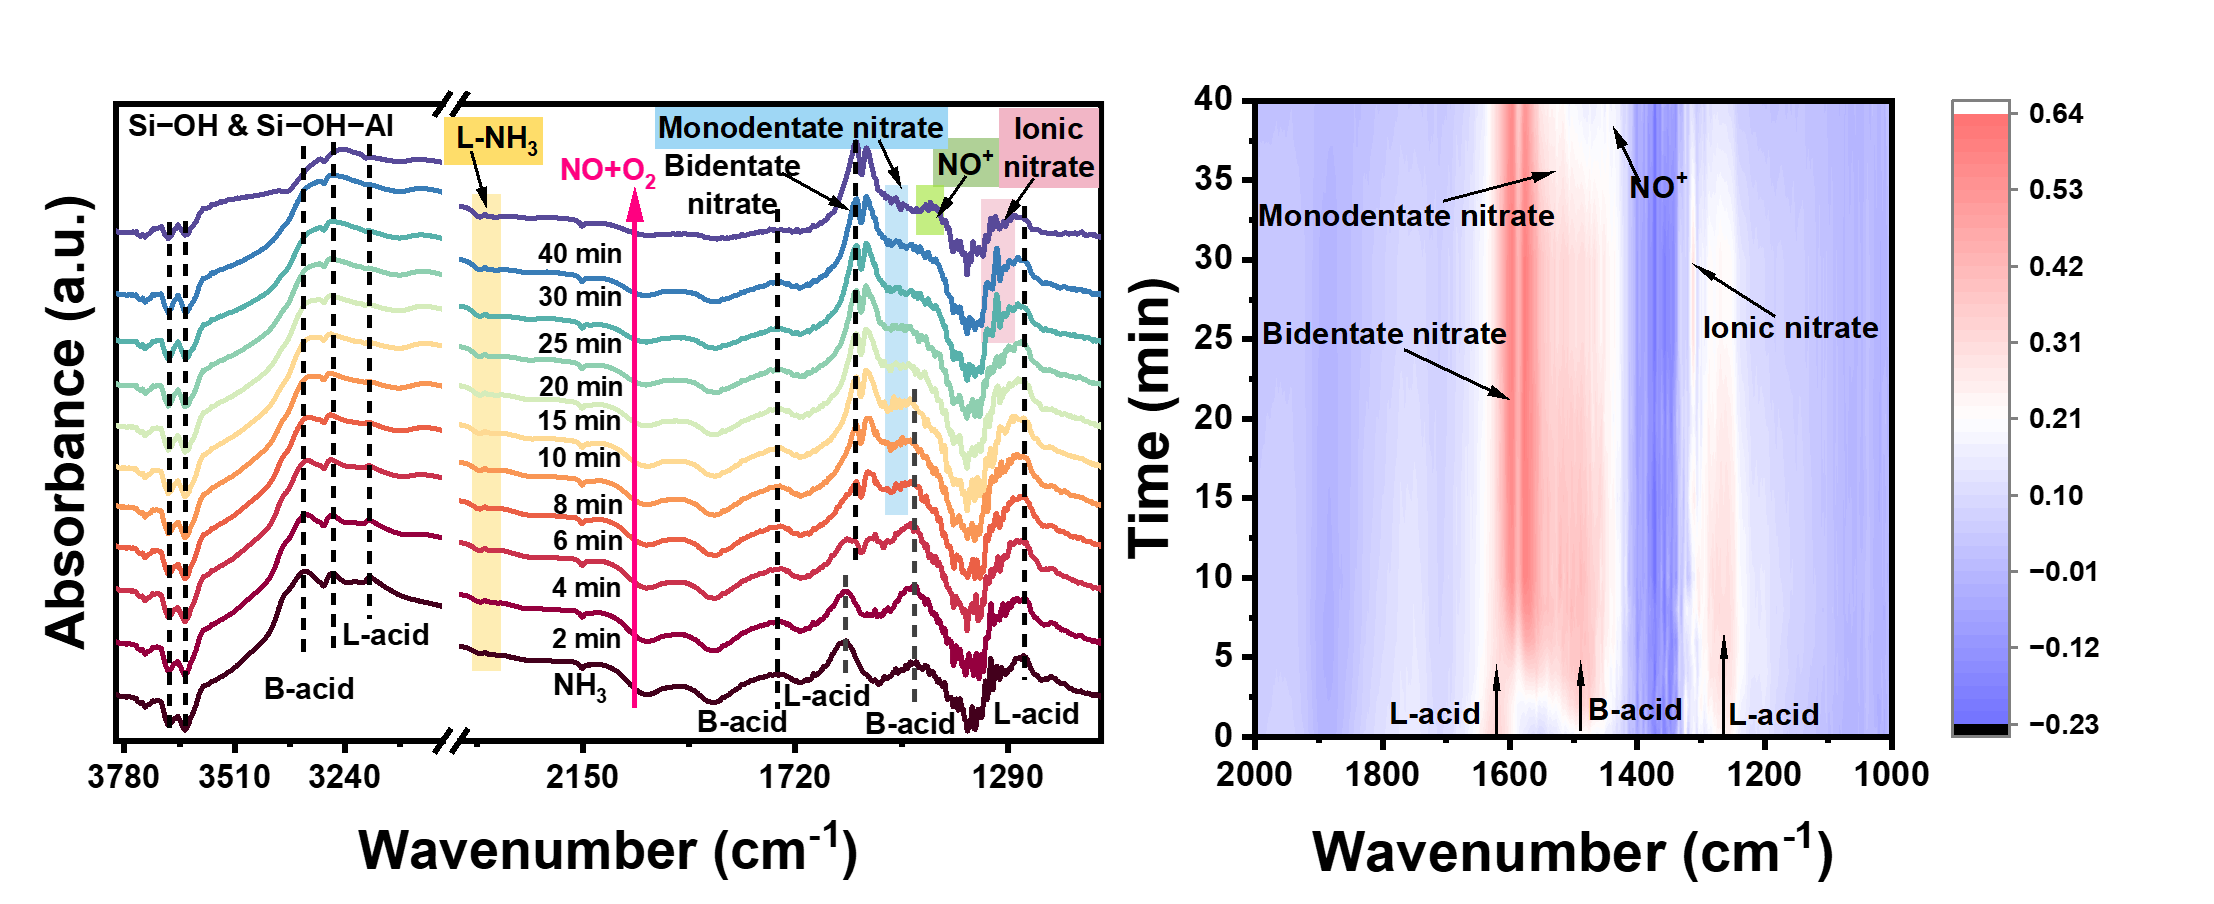
**

**Fig. S11.** *In situ* DRIFT spectra of the reaction between 500 ppm NO + 5% O2 and pre-adsorbed NH3 at 170 ℃ on the NdCuSSZ-13HT catalyst.


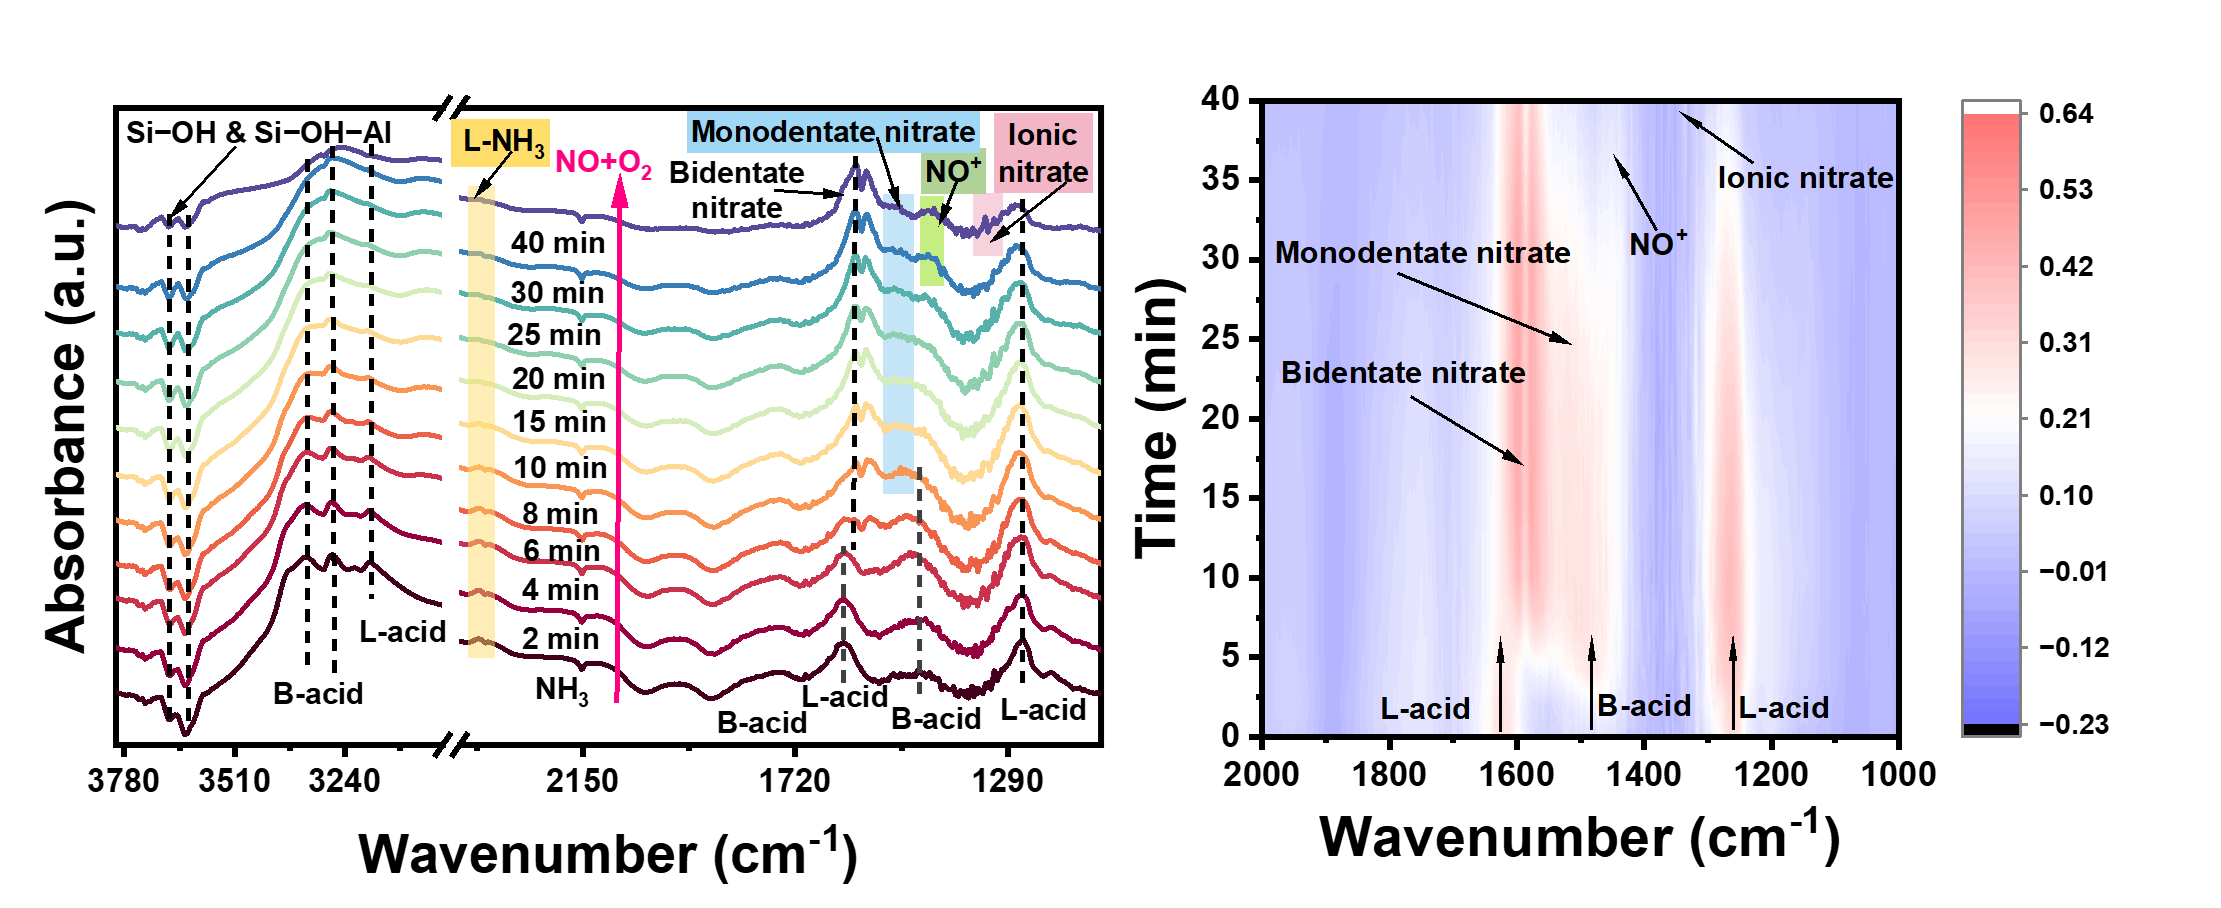


**Fig. S12.** *In situ* DRIFT spectra of the reaction between 500 ppm NO + 5% O2 and pre-adsorbed NH3 at 170 ℃ on the CeCuSSZ-13HT catalyst.


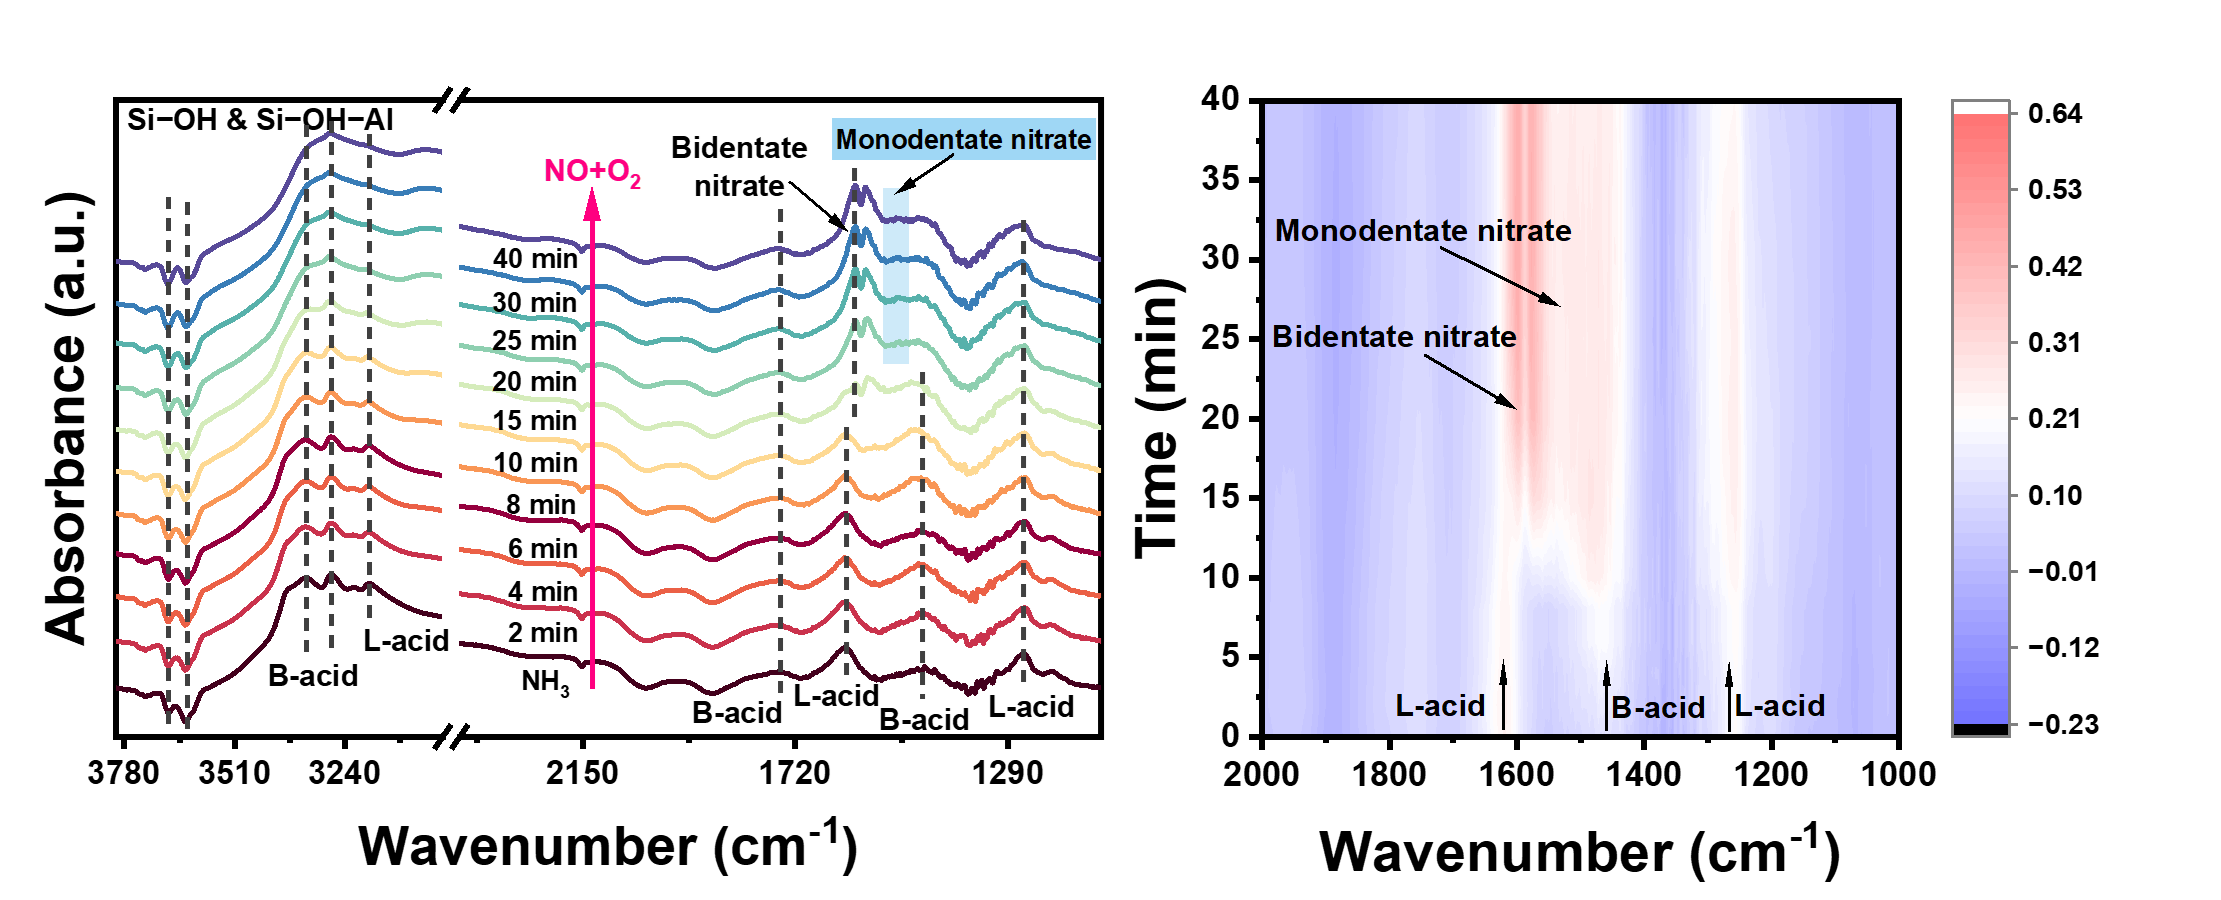


**Fig. S13.** *In situ* DRIFT spectra of the reaction between 500 ppm NO + 5% O2 and pre-adsorbed NH3 at 170 ℃ on the LaCuSSZ-13HT catalyst.


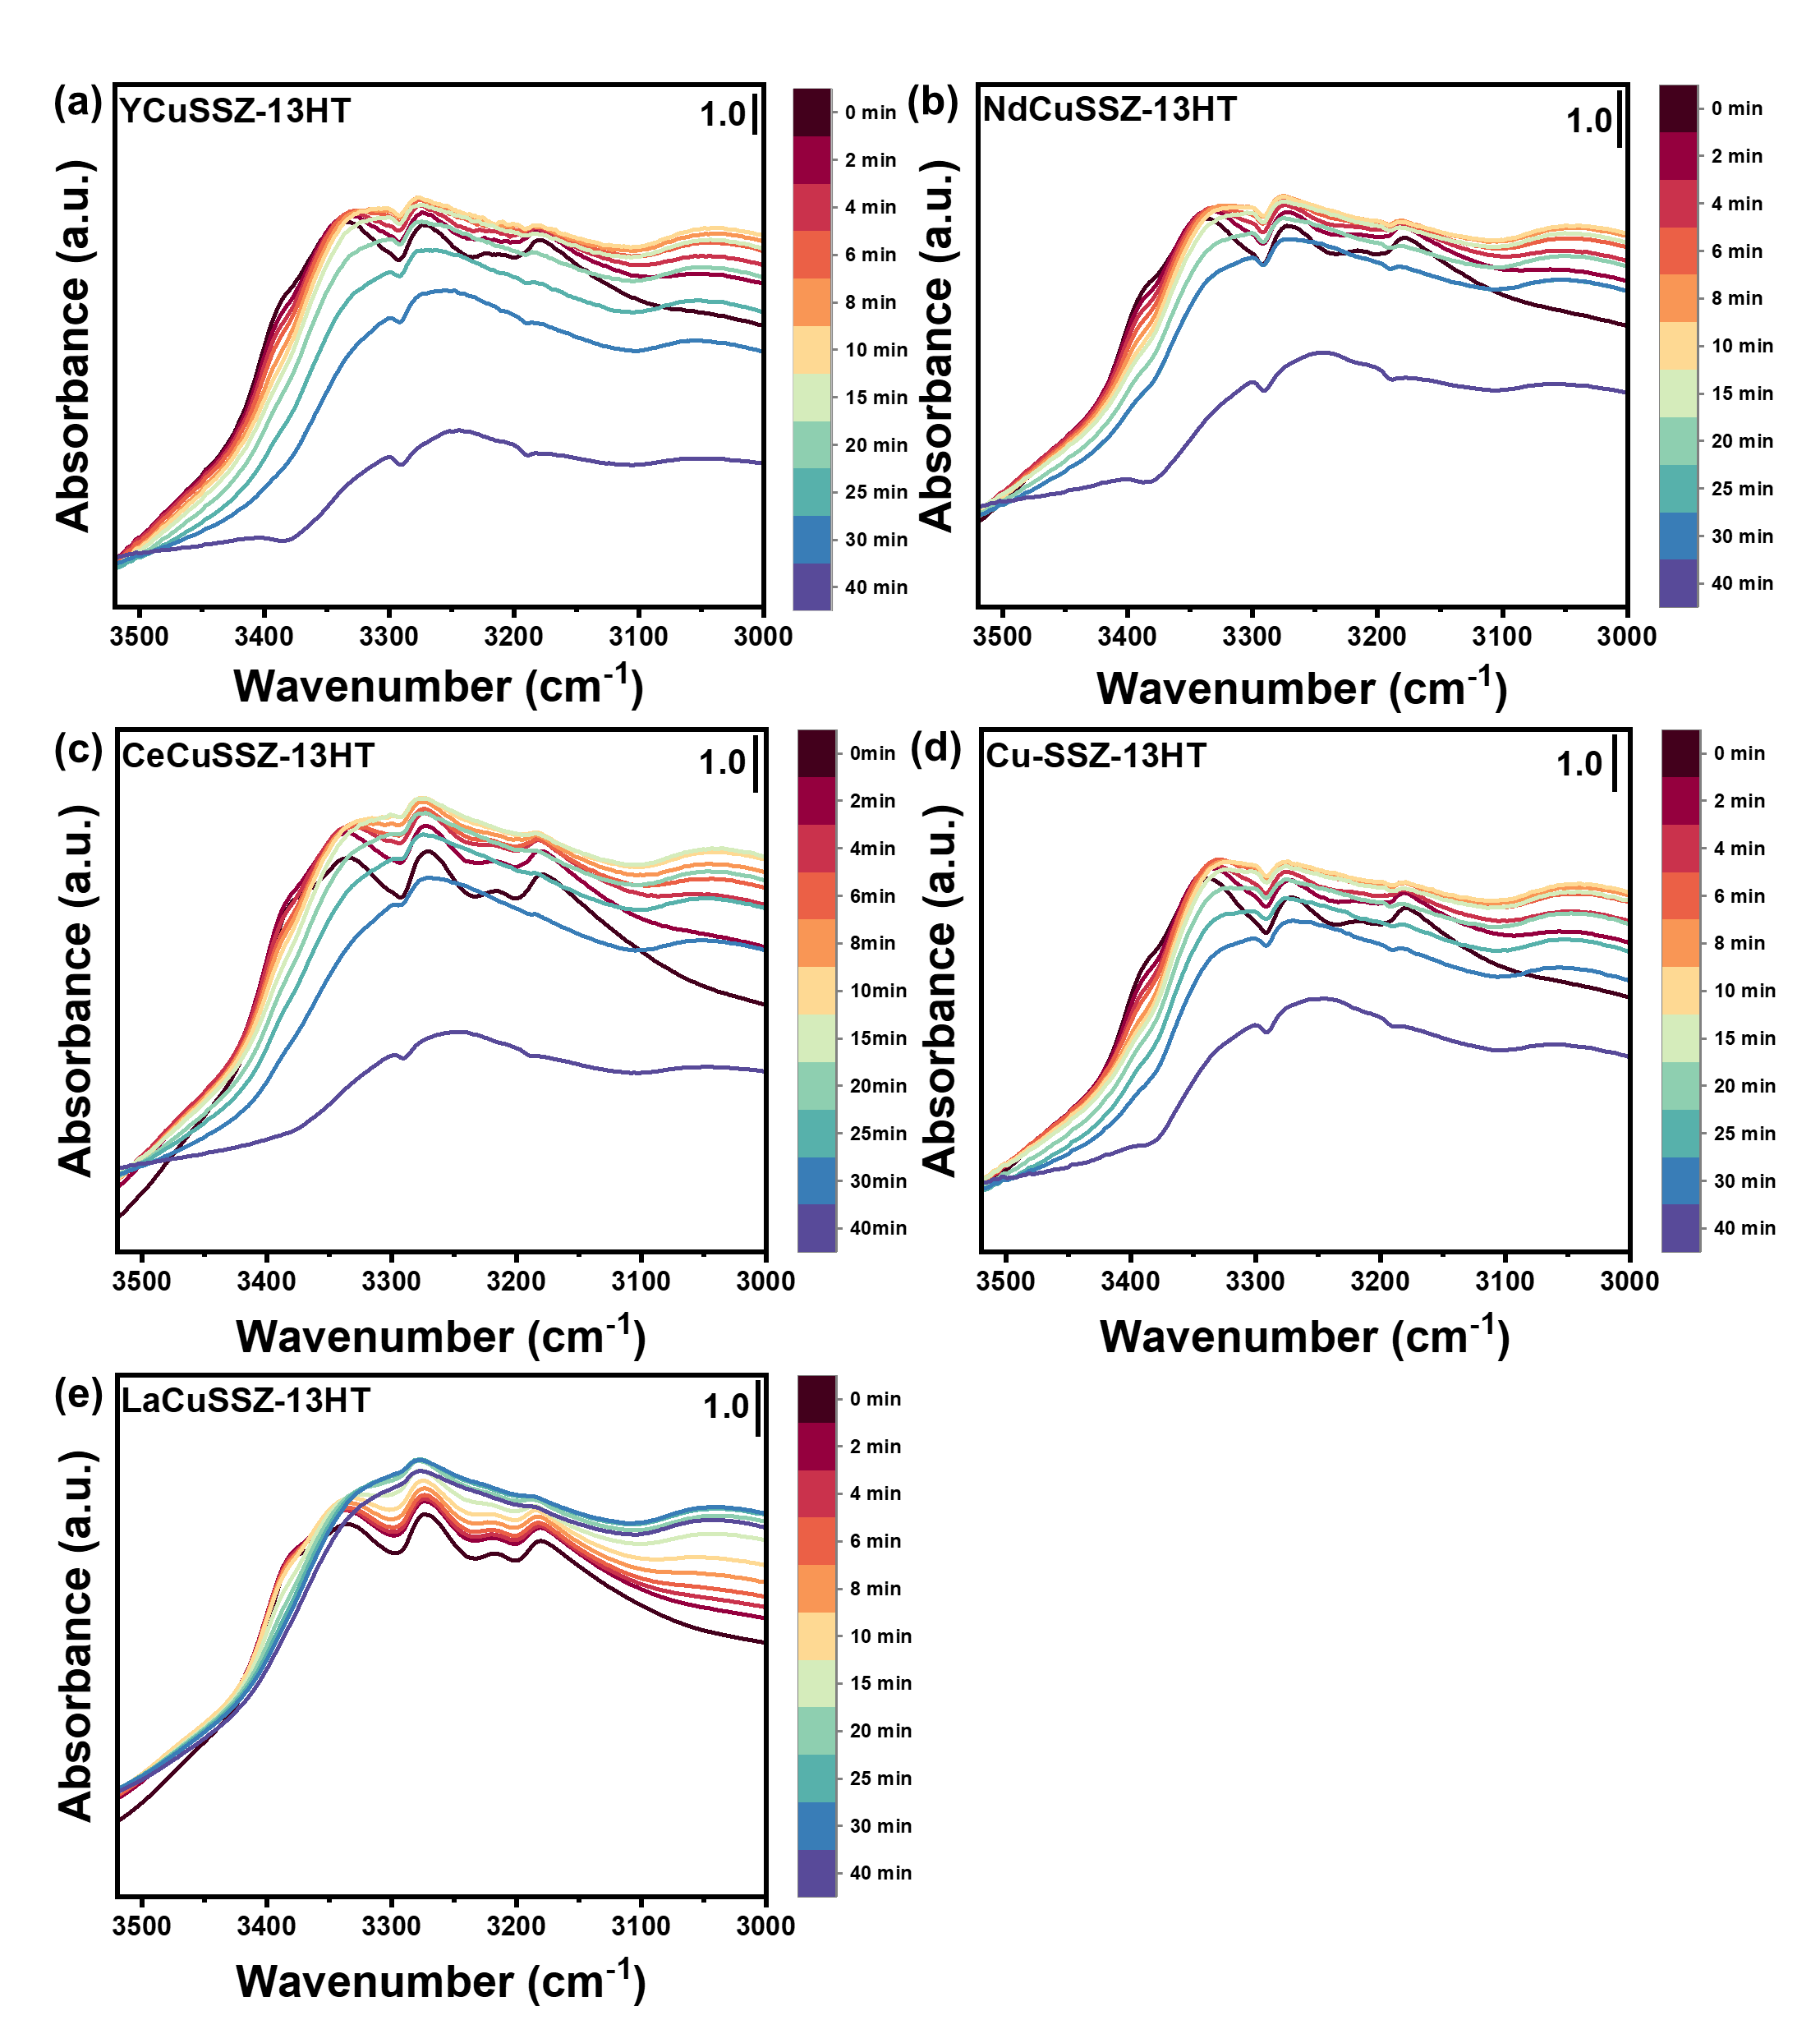


**Fig. S14.** *In situ* DRIFT spectra of the reaction between 500 ppm NO + 5% O2 and pre-adsorbed NH3 at 170 ℃ in the 3500~3000 cm-1 region.


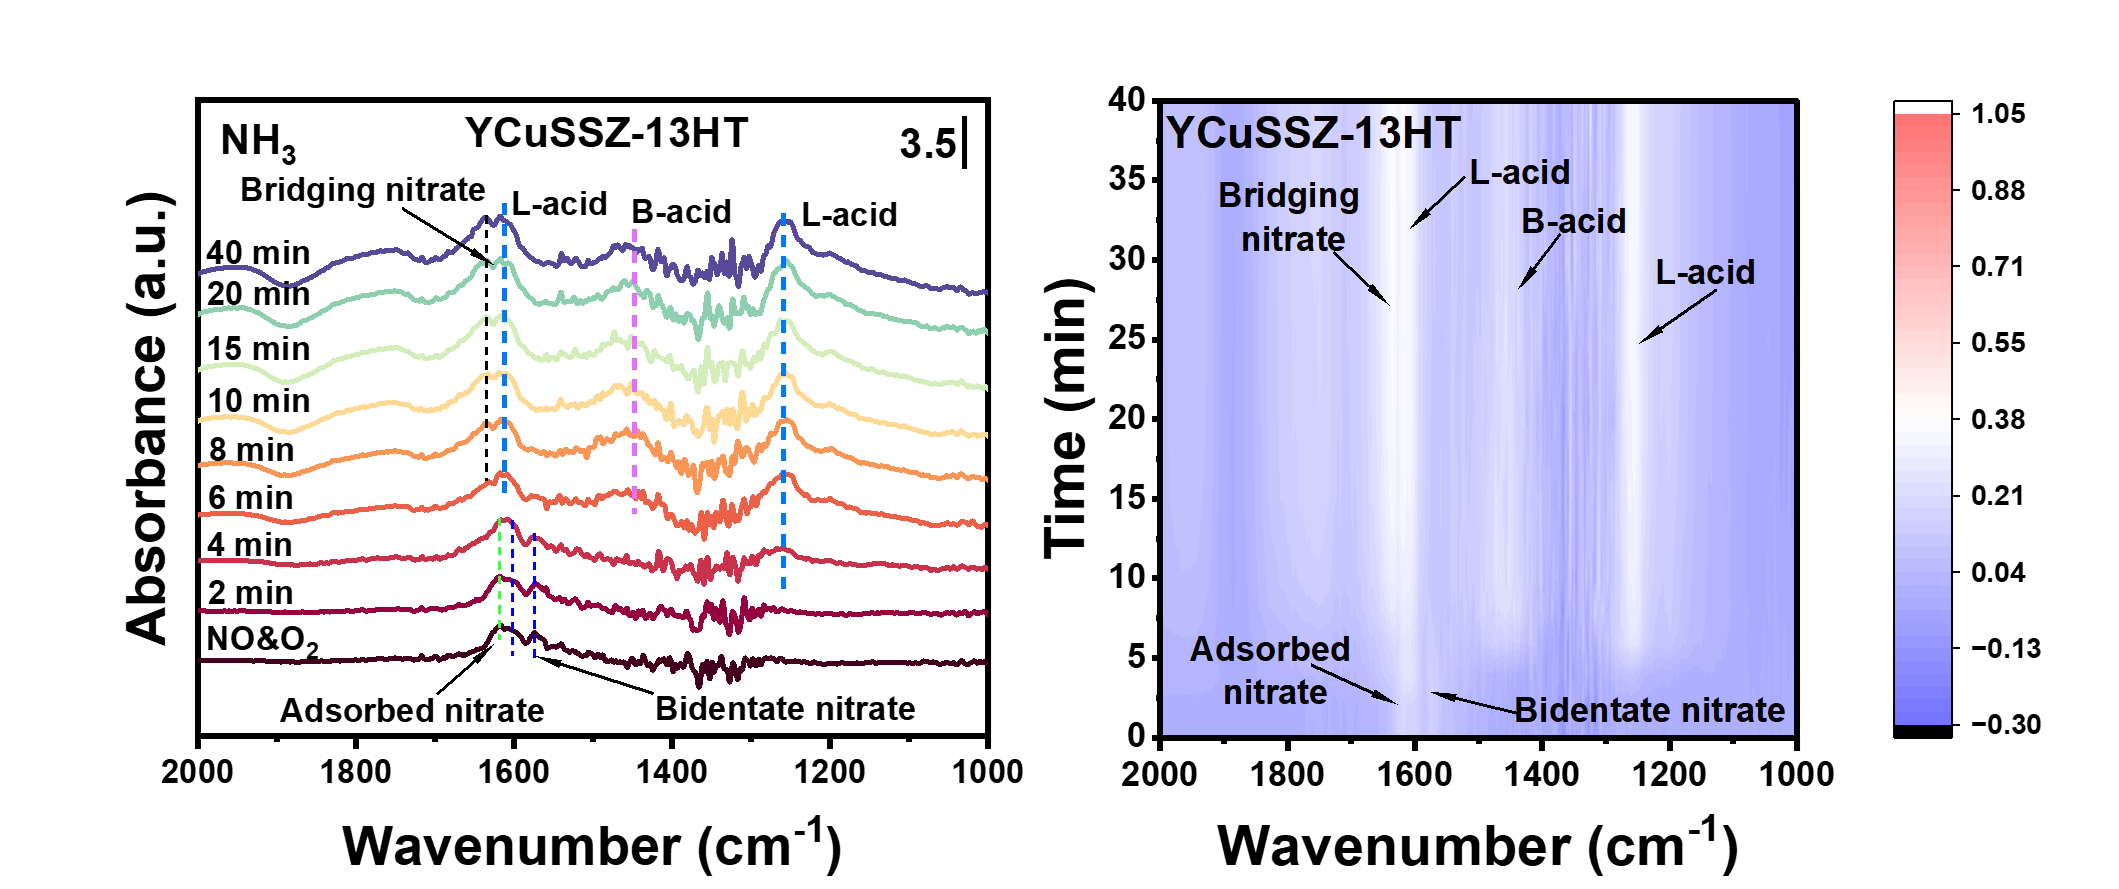


**Fig. S15.** *In situ* DRIFT spectra of the reaction between 500 ppm NH3 and pre-adsorbed NO + O2 at 170 ℃ on the YCuSSZ-13HT catalyst.

**
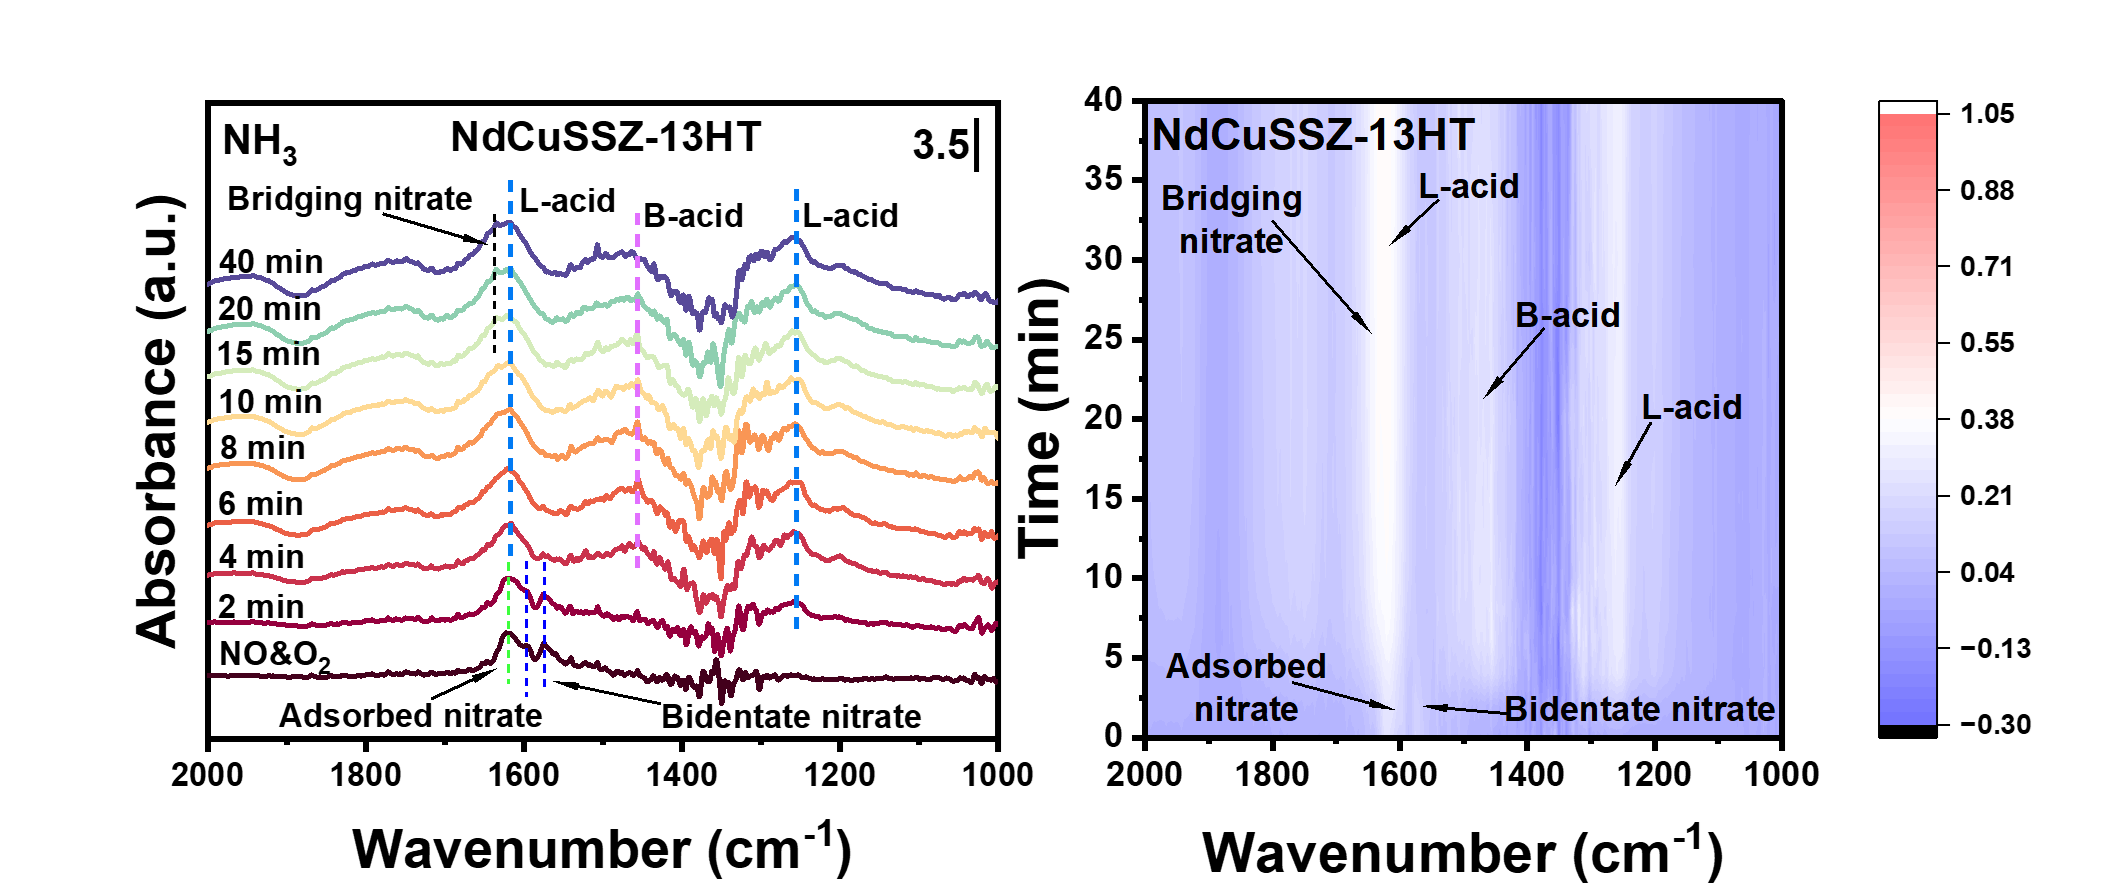
**

**Fig. S16.** *In situ* DRIFT spectra of the reaction between 500 ppm NH3 and pre-adsorbed NO + O2 at 170 ℃ on the NdCuSSZ-13HT catalyst.

**
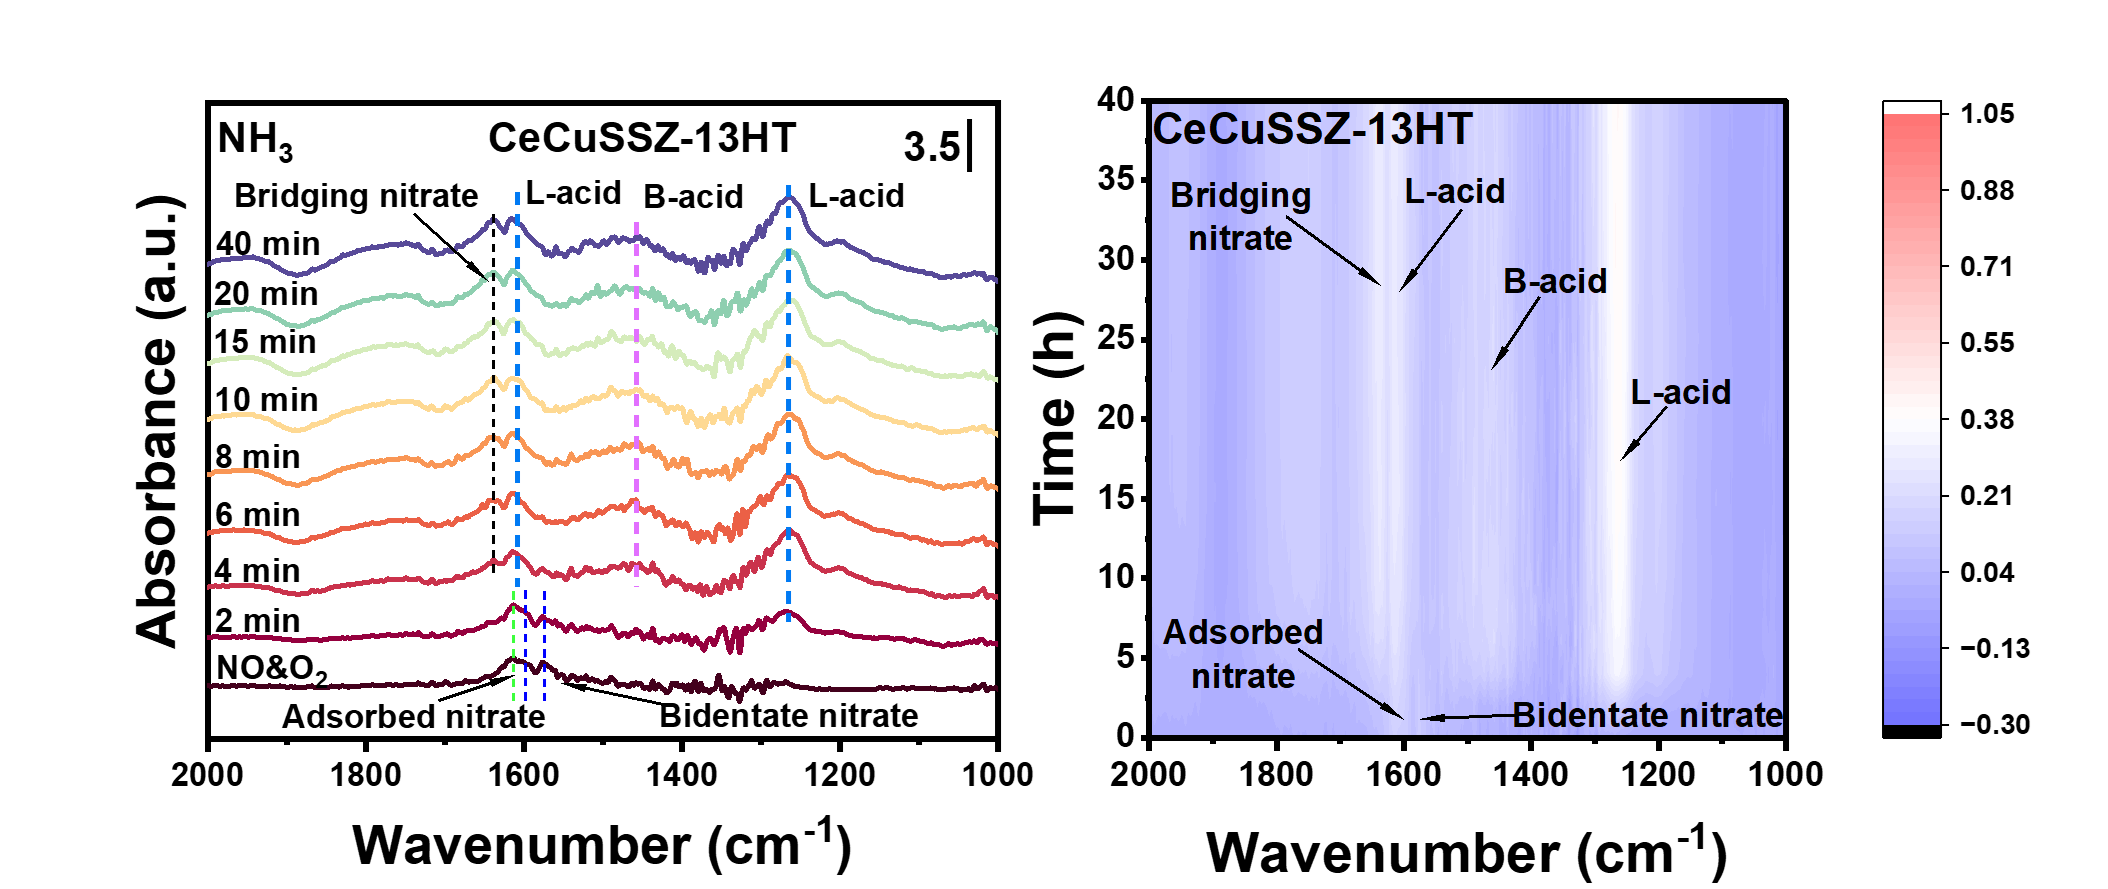
**

**Fig. S17.** *In situ* DRIFT spectra of the reaction between 500 ppm NH3 and pre-adsorbed NO + O2 at 170 ℃ on the CeCuSSZ-13HT catalyst.

**
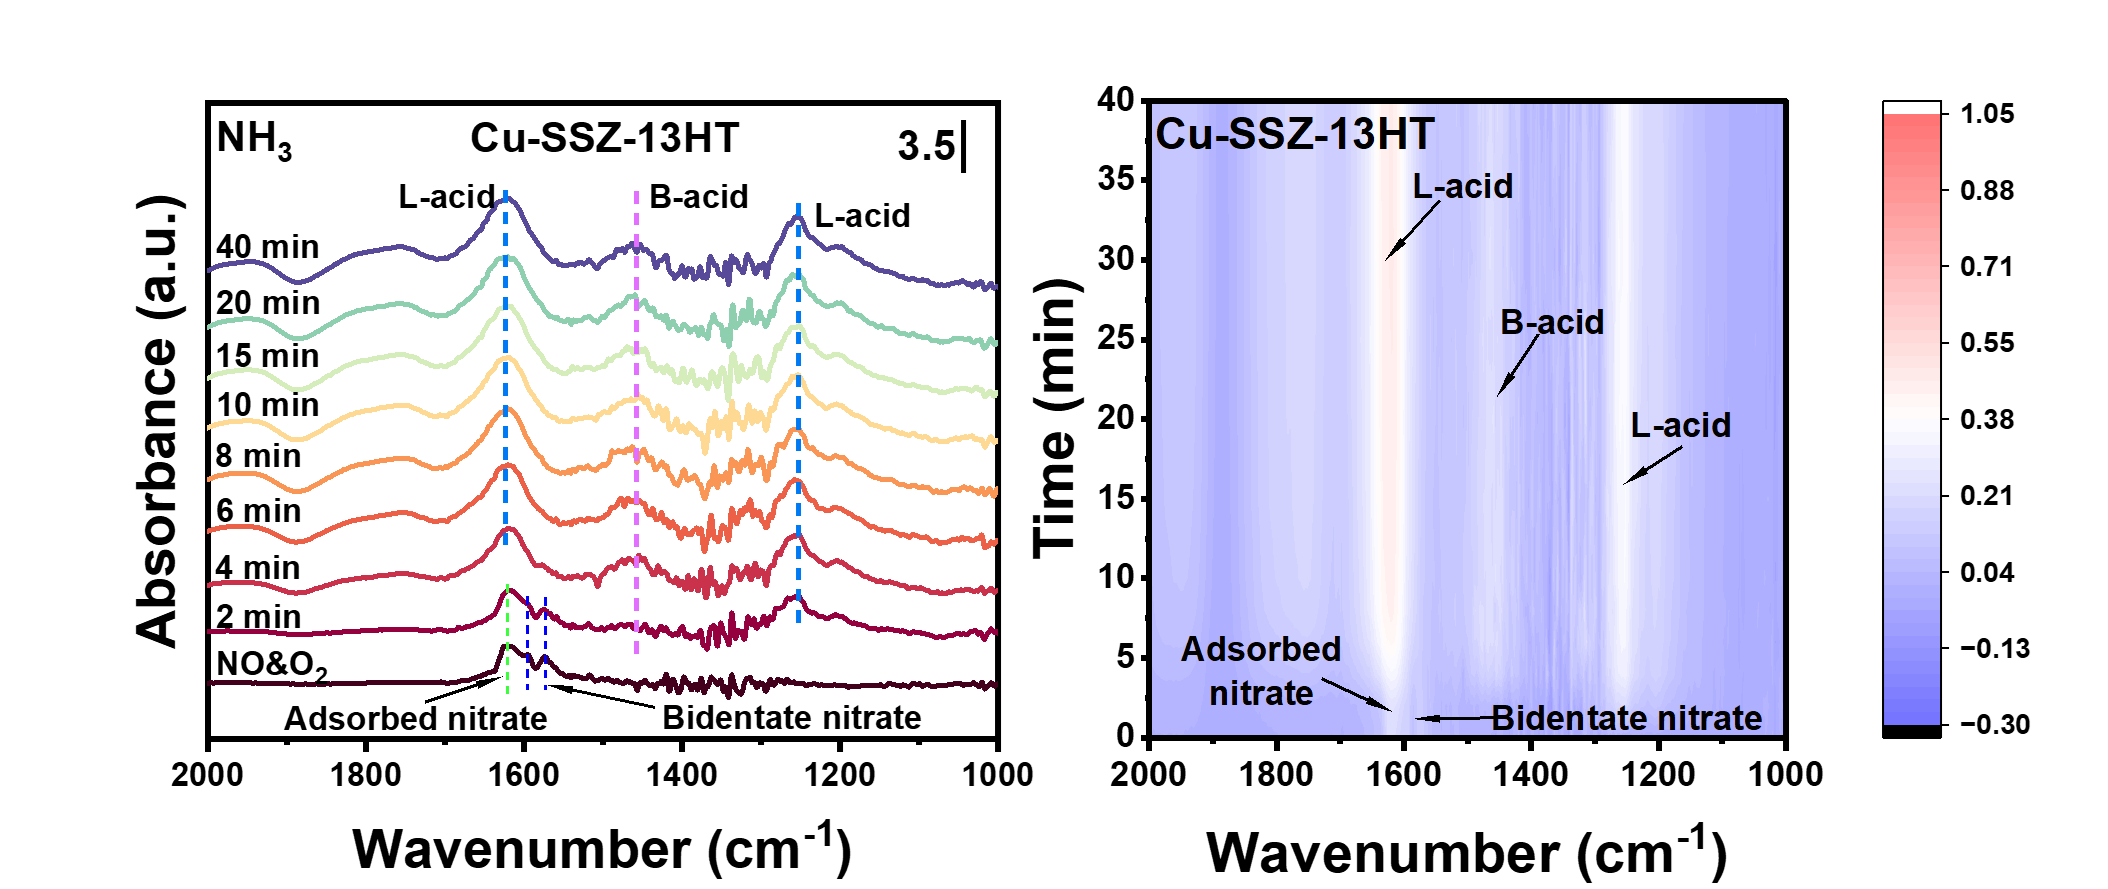
**

**Fig. S18.** *In situ* DRIFT spectra of the reaction between 500 ppm NH3 and pre-adsorbed NO + O2 at 170 ℃ on the Cu-SSZ-13HT catalyst.

**
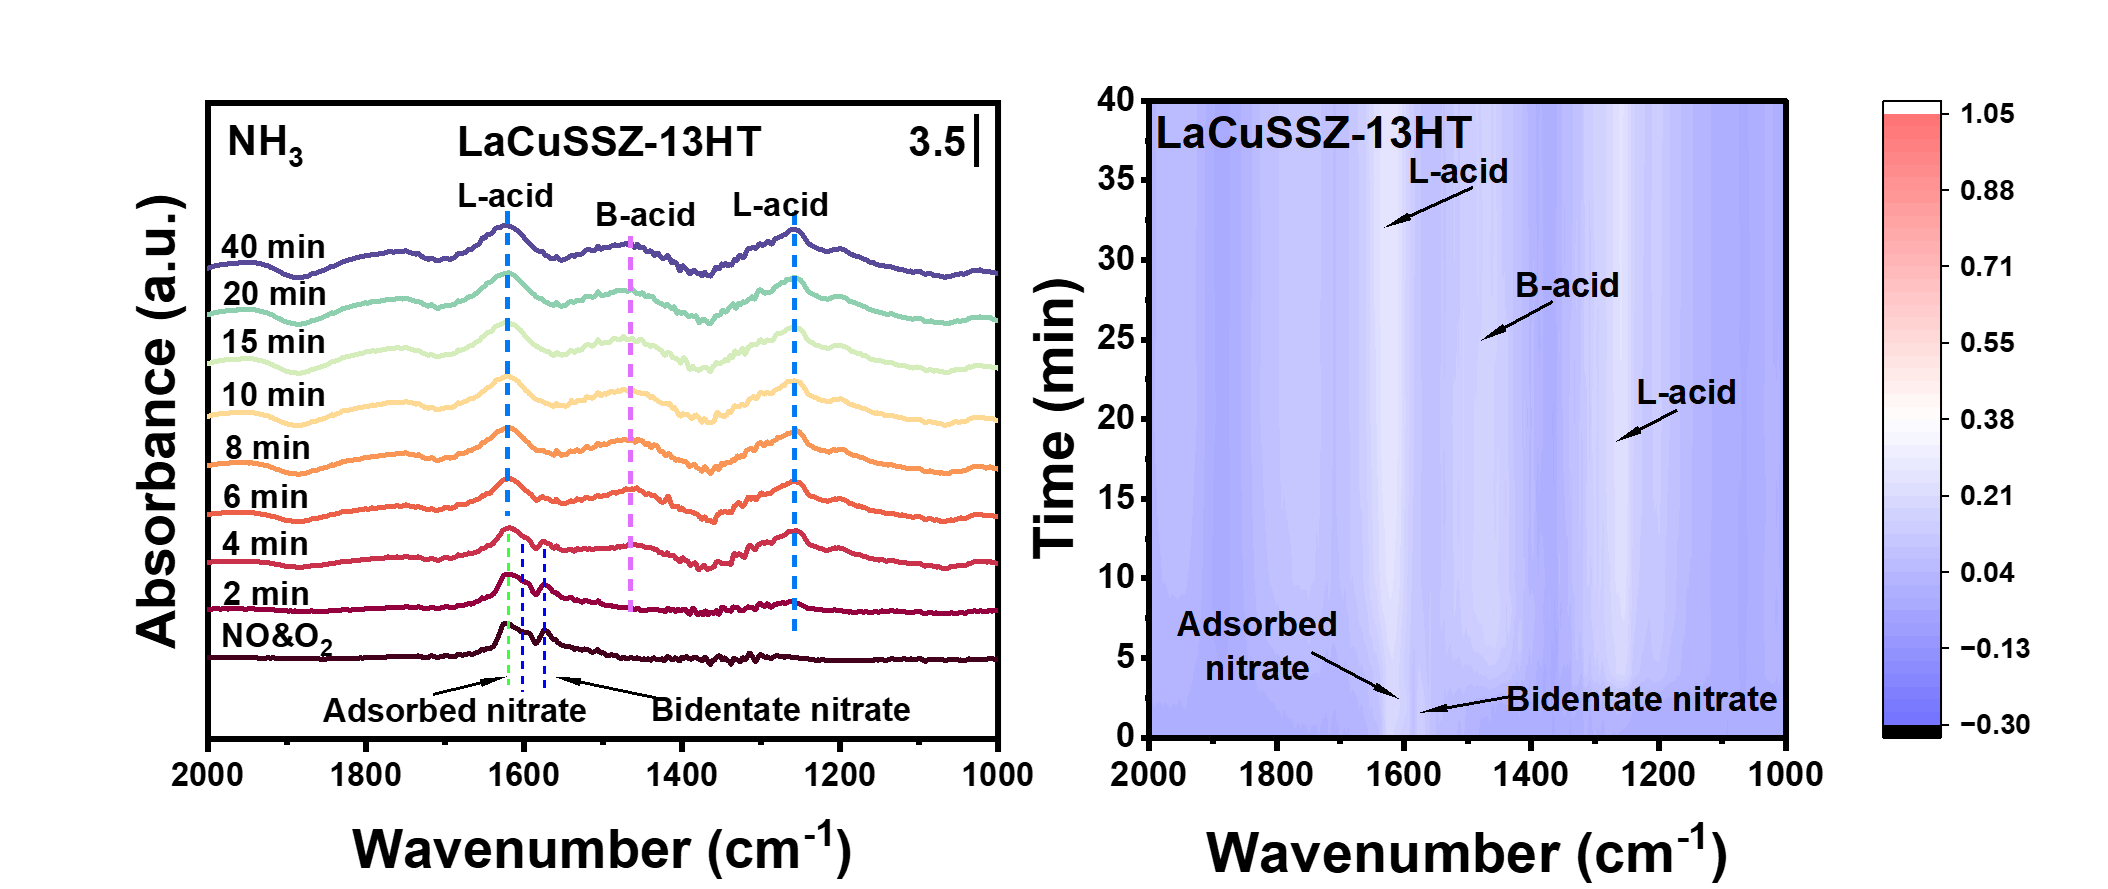
**

**Fig. S19.** *In situ* DRIFT spectra of the reaction between 500 ppm NH3 and pre-adsorbed NO + O2 at 170 ℃ on the LaCuSSZ-13HT catalyst.

**
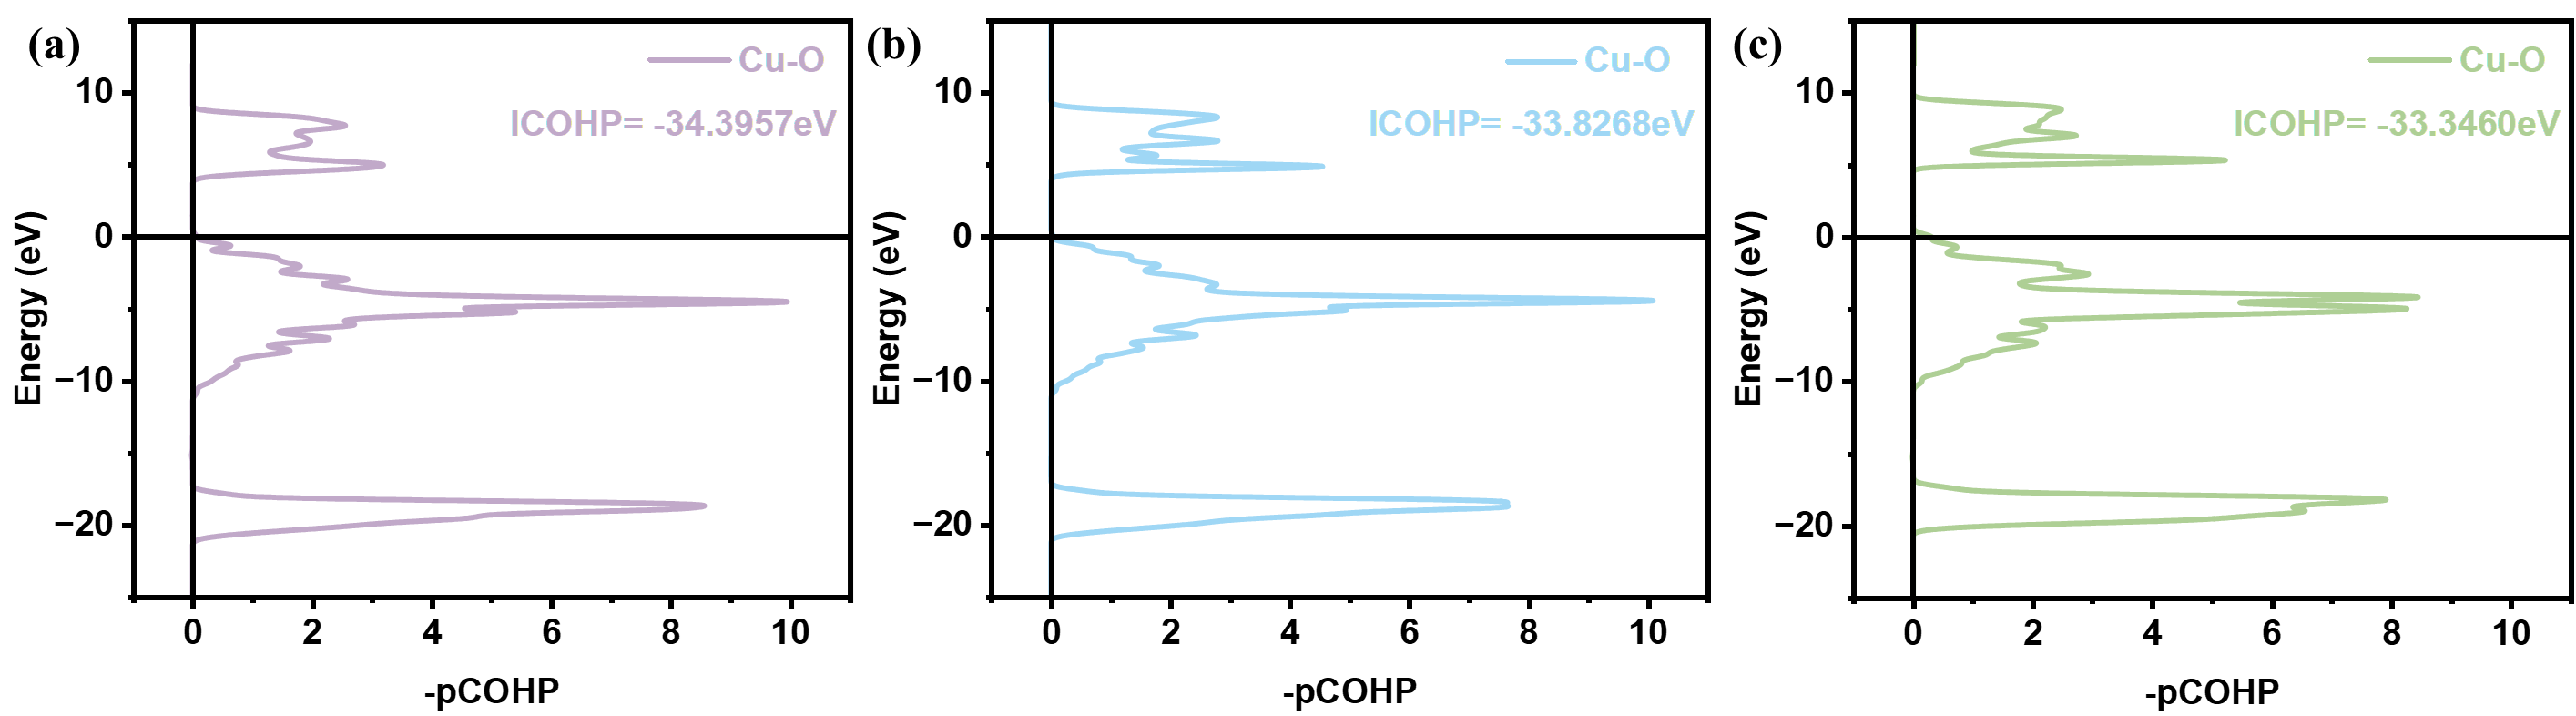
**

Fig. S20. The pCOHP and ICOHP results for (a) NdCuSSZ-13, (b) CeCuSSZ-13, and (c) LaCuSSZ-13 systems.

**
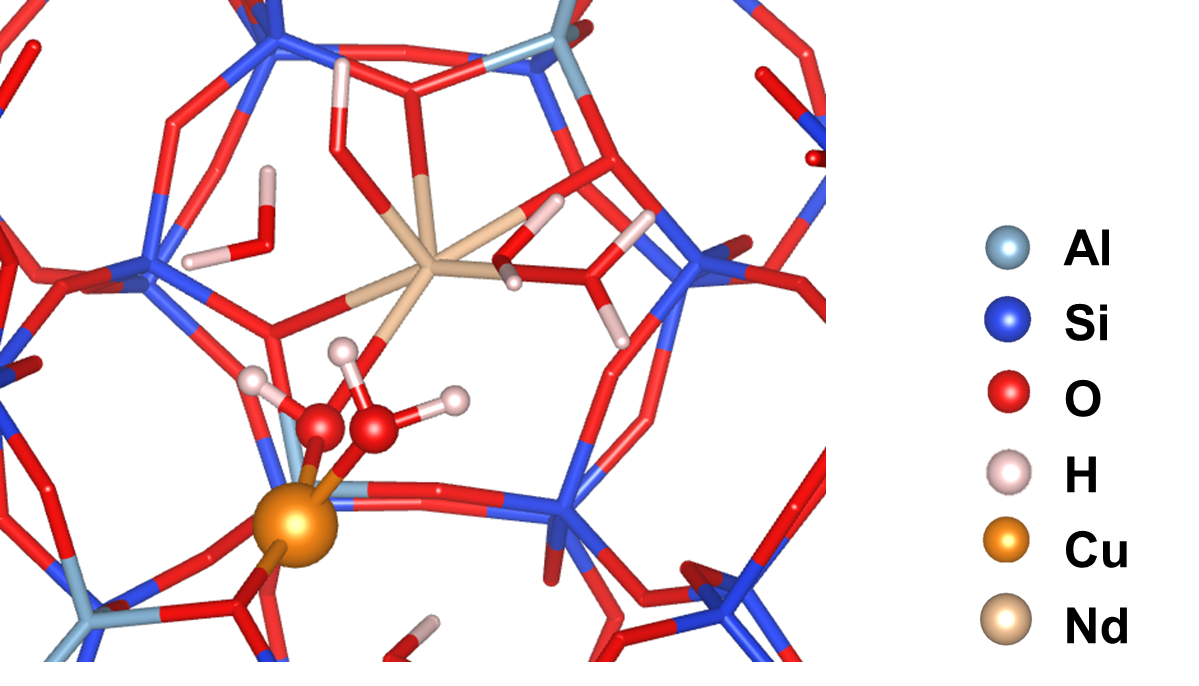
**

Fig. S21. Configuration from AIMD revealing a Cu(OH)2 unit within the NdCuSSZ-13 framework.

**
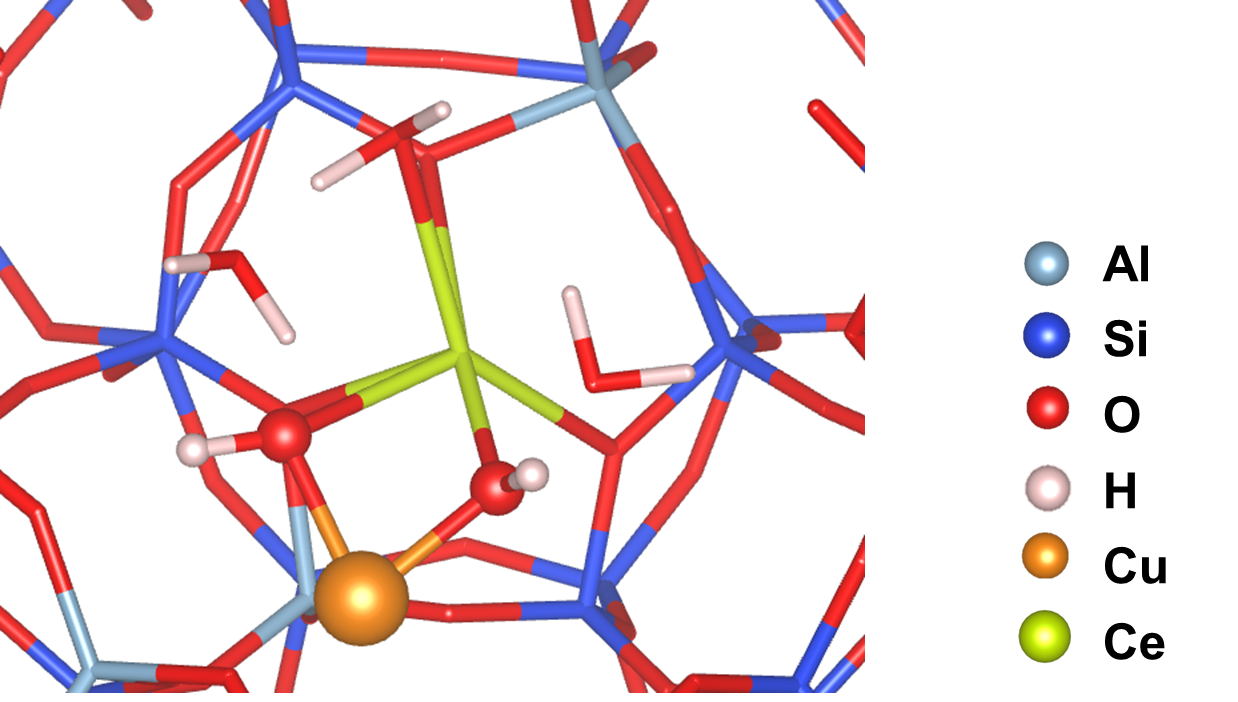
**

Fig. S22. Configuration from AIMD revealing a Cu(OH)2 unit within the CeCuSSZ-13 framework.

**
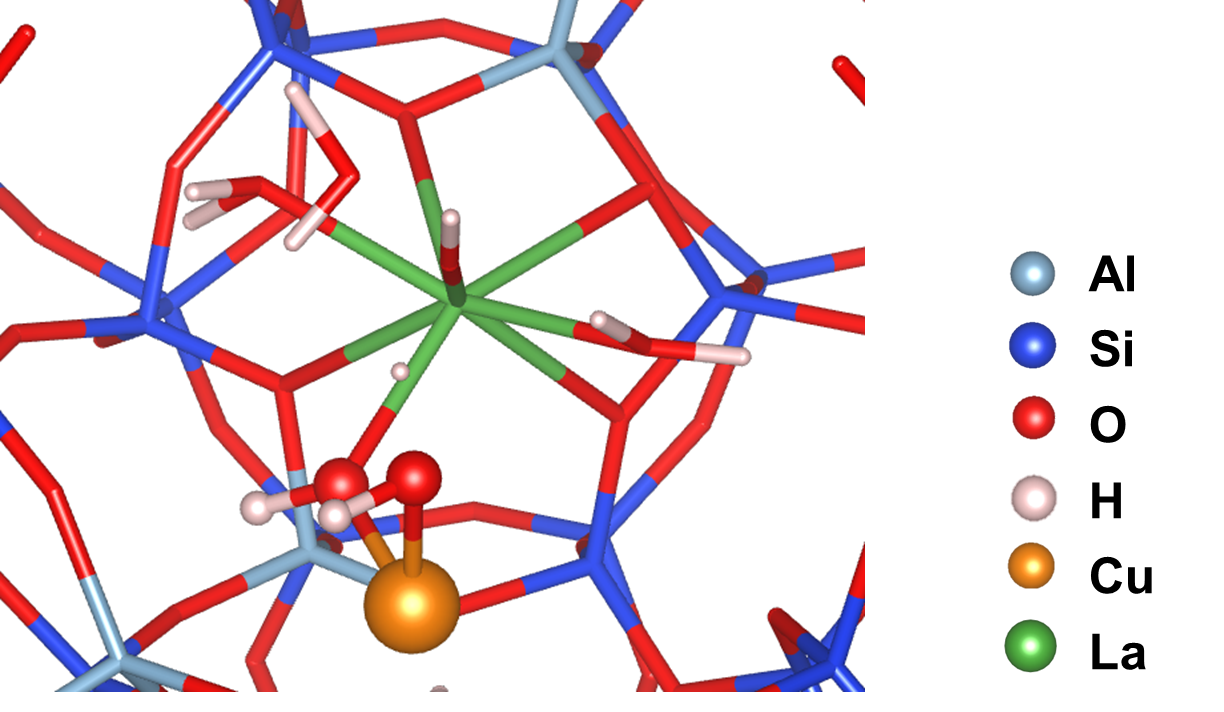
**

Fig. S23. Configuration from AIMD revealing a Cu(OH)2 unit within the LaCuSSZ-13 framework.

Table S1. Characterization of the Si/Al ratio and elemental composition of the catalysts.

| **Samples** | **Si/Ala** | **Cub** | **REb** |
| --- | --- | --- | --- |
| **LaCuSSZ-13** | 6.4 | 3.4% | 0.5% |
| **CeCuSSZ-13** | 6.2 | 3.5% | 0.5% |
| **PrCuSSZ-13** | 6.2 | 3.2% | 0.4% |
| **NdCuSSZ-13** | 6.2 | 3.6% | 0.4% |
| **SmCuSSZ-13** | 6.3 | 3.7% | 0.5% |
| **EuCuSSZ-13** | 6.1 | 3.5% | 0.4% |
| **YCuSSZ-13** | 6.1 | 3.2% | 0.4% |

a: Calculated by XRF.

b: Calculated by ICP.

**Table S2.** Data results related to **Fig. 2e**.

| **Catalysts** | **C175 a** | **C600 b** | **△T90 c** | **△CF-A d** | **△S95 e** |
| --- | --- | --- | --- | --- | --- |
| **YCuSSZ-13HT** | 89.9 | 80.5 | 379.4 | -1.1 | 450 |
| **NdCuSSZ-13HT** | 88.6 | 75.7 | 358.9 | 2.2 | 450 |
| **EuCuSSZ-13HT** | 83.1 | 77.7 | 364.2 | 2.9 | 450 |
| **CeCuSSZ-13HT** | 79.2 | 79 | 352.8 | 4.6 | 400 |
| **SmCuSSZ-13HT** | 78 | 81.2 | 382.6 | 4.1 | 450 |
| **Cu-SSZ-13HT** | 76 | 59.1 | 281.7 | 8.7 | 300 |
| **PrCuSSZ-13HT** | 73.8 | 75.6 | 349.1 | 2.7 | 450 |
| **LaCuSSZ-13HT** | 70.8 | 78.4 | 359.1 | 5.4 | 450 |

a: The NO*x* conversion at 175 ℃;

b: The NO*x* conversion at 600 ℃;

c: Temperature window corresponding to 90 % conversion;

d: The average value of the decrease in NO*x* conversions for the fresh catalysts and the hydrothermal-aged catalysts within the temperature range of 150 to 600 ℃;

e: The temperature range of N2 selectivity ≥95%.

Table S3. Representative rare earth modified Cu-zeolites for the NH3-SCR reaction.

| **Catalyst** | **NO*x* Conv. (175 ℃) -HT (%)** | **NOₓ Conv. (550 ℃) -HT (%)** | **ΔT90 (HT)** | **Ref.** |
| --- | --- | --- | --- | --- |
| **YCuSSZ-13HT** | 90 | 80 | 380 | This work |
| **Cu-Sm-SSZ-13** | 35 | 80 | 120 | [2] |
| **Cu-Pr-SSZ-13** | 33 | 78 | 100 | [3] |
| **Cu-Cd-SSZ-13** | 85 | 80 | 340 | [4] |
| **CM/CSZ-BM** | 50 | 70 | 190 | [5] |
| **Cu-Fe-SSZ-13** | 85 | 80 | 100 | [6] |
| **CuLa0.5-SAPO34** | 95 | 72 | 290 | [7] |
| **Cu/Y-S** | 65 | 70 | 180 | [8] |
| **Cu/SSZ-13@CeO2** | 32 | 60 | 0 | [9] |

The references (2~9) are consistent with those cited in **Fig. 2f** in the manuscript.

Table S4. EPR results of catalysts.

| **Samples** | **Total peak area of the curve (Hydrate-Dehydrate)** | **Percentage increase upon RE incorporation (%)** |
| --- | --- | --- |
| **YCuSSZ-13HT** | 916029.5 | 19.3 |
| **NdCuSSZ-13HT** | 832503.3 | 8.5 |
| **CeCuSSZ-13HT** | 827794.9 | 7.8 |
| **Cu-SSZ-13HT** | 767646.5 | - |
| **LaCuSSZ-13HT** | 742274.0 | -3.3 |

**Table S5.** Integral results of the NH3-TPD profile.

| **Samples** | **Relative Proportion of Integrated Peak Area (%)** | | | | | | | | |
| --- | --- | --- | --- | --- | --- | --- | --- | --- | --- |
| **Peak position** | | | | | **Peak Area** | | | |
| **YCuSSZ-13HT** | 231.7 | 274.5 | 337.2 | 463.5 | 677.4 | | 2086.6 | 3376.4 | 2565.1 |
| **NdCuSSZ-13HT** | 235.8 | 276.0 | 344.7 | 466.3 | 886.5 | | 2447.4 | 2983.2 | 2363.2 |
| **CeCuSSZ-13HT** | 234.8 | 275.7 | 348.5 | 464.0 | 600.0 | | 2622.4 | 2721.7 | 2581.3 |
| **Cu-SSZ-13HT** | 236.6 | 288.3 | 352.1 | 482.6 | 1200.0 | | 2754.6 | 2504.6 | 2568.4 |
| **LaCuSSZ-13HT** | 238.2 | 295.0 | 358.2 | 480.8 | 1735.3 | | 2803.1 | 2410.9 | 2064.4 |

**Table S6.** Comparison of the occurrence times of various nitrate species in *in-situ* DRIFT spectra.

| **Samples** | **Monodentate nitrate** | | | **Bidentate nitrate** | | **Nitrate** | |
| --- | --- | --- | --- | --- | --- | --- | --- |
| **Occurrence time** | | **Disappearance time** | **Occurrence times of nitrate species (min)** | | | |
| **YCuSSZ-13HT** | 2 | 20 | | | 4 | | 25 |
| **NdCuSSZ-13HT** | 6 | 40 | | | 4 | | 25 |
| **CeCuSSZ-13HT** | 8 | 40 | | | 6 | | 40 |
| **Cu-SSZ-13HT** | 4 | 40 | | | 4 | | 40 |
| **LaCuSSZ-13HT** | 20 | 40 | | | 15 | | - |

**Reference**

[1] Luo J*, et al.* New Insights into Cu/SSZ-13 SCR Catalyst Acidity. Part I: Nature of Acidic Sites Probed by NH3 Titration. *J. Catal.* **348**, 291-299 (2017).

[2] Chen MY*, et al.* Unveiling secondary-ion-promoted catalytic properties of Cu-SSZ-13 zeolites for selective catalytic reduction of NOx. *J. Am. Chem. Soc.* **144**, 12816-12824 (2022).

[3] Chen MY*, et al.* Improving the hydrothermal stability of Al-rich Cu-SSZ-13 zeolite via Pr-ion modification. *Chem. Sci.* **15**, 5548-5554 (2024).

[4] Li M*, et al.* The preferential occupying effect regulated atomically dispersed Cu site over Cu-SSZ-13 for enhancing NH3-SCR performance. *Fuel* **380**, 133202 (2025).

[5] Andana T*, et al.* Selective catalytic reduction of NOx with NH3 over Ce-Mn oxide and Cu-SSZ-13 composite catalysts – low temperature enhancement. *Appl. Catal. B Environ.* **316**, 121522 (2022).

[6] Tan MJ*, et al.* Introduction of iron by a feasible way to regulate Cu sites of Cu-SSZ-13 with enhanced hydrothermal stability and SO2 resistance for NH3-SCR. *Micropor Mesopor Mat.* **394**, 113668 (2025).

[7] Li GB*, et al.* One stone four birds: The redox and acid-basic site integral regulation by La in Cu-SAPO-34 for boosting NO reduction. *Appl. Catal. B Environ.* **378**, 125647 (2025).

[8] Gao LY*, et al.* Boosting low-temperature and high-temperature hydrothermal stability of Cu/SAPO-34 for NO removal via Yttrium decoration. *Chem. Eng. J.* **455**, 140520 (2023).

[9] Zhang JN*, et al.* Enhancing hydrothermal stability in Cu/SSZ-13 catalyst for diesel SCR applications through a novel core-shell structure. *Chin. Chem. Lett.* **36**, 110516 (2025).
